# Supplementary material
Source: publisher figshare collection journal article supplement (https://tandf.figshare.com/ndownloader/files/12499793)
Supplement: Supplementary file 1 [file 12499793]

**Supporting information**

**Helical Supramolecular Self-assembly by Prolamide Thymidine/Uridine analogues** Chandrasekhar Reddy Gade and Nagendra K Sharma*a

*School of Chemical Sciences, National Institute of Science Education and Research (NISER), Bhubaneswar, Jatni-752050, Odisha, India NISER,Bhubaneswar, Jatni-752050,Odisha,India & HBNI-Mumbai, India.*E-mail: [nagendra@niser.ac.in](mailto:nagendra@niser.ac.in).

**Contents**

Contents

[1. General methods and instrumentation: 2](#__RefHeading___Toc517537737)

[2. Crystallography deatils 2](#__RefHeading___Toc517537738)

[3. Experimental procedure for synthesis of compound 2-5 2](#__RefHeading___Toc517537739)

[4. NMR and HRMS spectra of compound 2-5 5](#__RefHeading___Toc517537740)

[5. Self-assembly study of 5a and 5b by ESI-MS 14](#__RefHeading___Toc517537741)

[6. SEM –images of compound 5a 16](#__RefHeading___Toc517537742)

[6. SEM –images of compound 5b 19](#__RefHeading___Toc517537743)

[7. IR-Spectra of compound 5a/5b 23](#__RefHeading___Toc517537744)

# 1. General methods and instrumentation:

All reagents were purchased from commercial sources. DMF and DCM dried over calcium hydride and stored on 4 Å molecular sieves. THF distilled over sodium benzophenone and store over sodium wire Mass experiments were performed on Bruker ESI-MicroTOF-QII. NMR spetra were recorded on Bruker-400 MHz. Single crystals X-ray diffraction data were collected on a Bruker 4-circle Kappa APEX-II diffractometer equipped with a CCD detector the X-ray source being Mo Kα (wavelength 0.71073 Å) at room temperature.

# 2. Crystallography deatils

A suitable single crystal of each complex was carefully selected under a polarizing microscope. Single crystal structure determination by X‒ray diffraction was performed on a Siemens SMART-CCD diffractometer equipped with a normal focus, 2.4 kW sealed-tube X-ray source (*Mo‒Kα* radiation, *λ* = 0.71073Å) operating at 50 kV and 30 mA. Structures were solved by the direct method using SHELXT 2014 and refined on *F*2 by a full‒matrix least-squares technique using the SHELXL 2014 programs package. An empirical absorption correction based on symmetry equivalent reflections was applied using SADABS. The graphic programs DIAMOND 3.2 was used to draw the structures. Non-hydrogen atoms were refined anisotropically. In the refinement, hydrogens were treated as riding atoms using the SHELXL default parameters.

# 3. Experimental procedure for synthesis of compound 2-5

*N*-Boc-Prolinol **(2)** 4.0g (18.6mmol) boc proline was dissolved in 30 ml dry THF and stirred at 00c for 10 minutes under nitrogen atmosphere,borane dimethyl sulphide (5M in diethyl ether) 3.71ml (18.6mmol) was added drop wise with syringe at 00c .After 10 minutes the reaction mixture warmed to room temperature and stirred for 6 hours.The reaction mixture evaporated to dryness and coevaporated with methanol (2x30 ml) and extracted with water and ethylacetate .Ethyl acetate layer washed with brine solution and dried with anhydrous sodium sulphate and concentrated at reduced pressure. White solid 3.73 g obtained in quantitative yield used directly in next step without any purification.

1HNMR (400MHz in CDCl3) δ1.45(s,9H),1.84-1.85(m, 3H) ,1.95-2.04(m, 2H) ,3.26-3.32(m, 1H),3.41-3.49(m,1 H),3.54-3.62(m, 2H),3.85-3.94(m, 1H) 4.74(s, 1H) 13CNMR(100M HZin CDCl3) δ24.18, 28.57, 28.22, 47.66, 60.30, 67.78, 80.33, 157.26 HRMS (ESI-TOF) Calcd for (C10H19NO3 +Na)+  224.1257 found 224.1231

*O*-Benzoyl-*N*-Boc prolinol **(3)**

To a solution of Boc prolinol 3.6 g (18.15mmol) in dry DCM (30ml), triethylamine 5.0ml(36.3mmol) was added at 00C followed by addition of benzoyl chloride 3.1 ml (27.2 mmol) drop wise and the reaction was stirred at room temperature over night. 50 ml water was added to the reaction mixture and stirred for 10 min and organic layer was separated. Aqueous layer extracted with DCM(2x50 ml) .Combined organic layer washed with brine solution and dried with anhydrous sodium sulphate ,concentrated at reduced pressure and purified by silica gel column chromatography (ehtylacetate and hexane) to afford 4.9 g of white solid in 90% yield.

1H NMR (400MHz CDCl3) δ 1.45(S,9H),1.85-2.0(m,4H), 3.29-3.53(br, 2H) 4.10-4.42(m,3H),7.43(t,2H 8hz),7.55(t,1H 8hz),8.03(d ,2H 8hz). 13CNMR(100 MHz CDCl3) δ23.30,23.98, 28.05,28.59,29.00, 46.62,48.5, 55.79, 65.20,65.39, 79.55,79.92,128.50, 129.74, 130.18, 133.16, 154.61, 166.51. HRMS Calcd for (C17H23NO4+Na)+ : 328.1519 found 328.1542.

S-(1-(2-Chloroacetyl)pyrrolidine-2-yl)methyl benzoate **(4):** 530 mg (1.73mmol) of compound **3** was treated with 10 ml of TFA.DCM(20%) at room temperature after 3hours the reaction mixture was evaporated to dryness and diluted with 5ml dry acetonitrile, triethylamine 0.48 ml(3.47mmol) was added at 00c under N2 atmosphere followed by chloroacetyl chloride 0.207 ml (2.6mmol) at 00c and stirred overnight at room temperature .The reaction mixture concentrated and extracted with ethylacetate and water .Ethyl acetate layer washed with brine solution, dried with anhydrous sodium sulphate and concentrated followed by purification on silica gel column chromatography to obtain colurless oily compound 380 mg in 78% yield.

1H NMR (400MHz CDCl3) δ 1.96-2.13(m,4.3H), 3.57-3.64(m,2H), 4.04(s,1.42H), 4.12-4.17(m,0.45H),4.29-4.74(m,3H), 7.44(t,2H8HZ),7.56 (t,1H 8HZ) 8.01(d,2H 8HZ ) 13CNMR(100MHz CDCl3) δ 21.16, 24.40, 27.39, 28.89, 41.62, 42.36, 46.33, 47.32, 56.25, 56.96, 63.93, 65.13, 128.48, 128.66, 129.33, 129.61, 129.96, 133.13, 133.57, 165.49, 165.76, 166.32, 166.36. HRMS (ESI-TOF) Cald for (C14H15O3NCl+H)+: 282.0891 found 282.0889 .

Prolamide Thymidine alcohol **(5b)**

0.126 g (1.00mmol) of thymine dried under high vacuum at room temperature for 2 hours and dissolved in 4 ml anhydrous DMF followed by addition of 0.2g (1.5mmol) anhydrous potassium carbonate and 18-crown-6, 52mg (0.2mmol) and stirred at 600c for 20 minutes under N2 atmosphere followed by addition of anhydrous DMF solution (2.8ml) of compound **5** 0.28g (1.0mmol) by a syringe and stirred over night at 600c .The reaction mixture was concentrated to dryness and extracted with water and ethyl acetate.Ethylacetate layer dried with anhydrous sodium sulphate and concentared to get white pluffy compound which was dissolved in methanol, stirred at room temperature for 10 minutes followed by addition of 0.276 g (2.0 mmol) of potassium carbonate and stirring was continued for 24 hours at room temperature, the reaction mixture was concentrated and purified by silica gel column chromatography using DCM/MeOH to obtain a white solid 0.262 g in 95% yield

1H NMR (400 MHz CD3OD) 1.88(s, 3H), 1.93-2.11(m,4H),3.41-3.66(m,4.0H),4.08-4.18(m,1H),4.50-4.71(m, 2H),7.32(s,1H) 13C NMR (CDOD3100MHz) δ12.33, 22.54, 25.09, 28.01, 29.14, 60.42, 61.21, 62.92, 64.48, 110.79, 110.96, 143.74, 143.99,153.18, 166.97,167.84,168.34 HRMS (ESI-TOF) Calcd for (C17H12N3O4Na) 268.1292 found 268.1290

Prolamide Uridine alcohol **(5a)**: 0.112 g (1.0 mm) of uracil used to syntheisize the compound **5b** in a similar procedure to obtain 0.240 g **5a** in 95%yield as white soild.1H NMR (400 MHz CD3OD)1.69-2.27,(m,4H)3.28(m, 2H),3.61-3.85(m, 3H),4.30(s, 1H) 4.56(s,1H),5.64-5.70(m, 1H) 7.49-7.60 (m, 1H)(CD3OD,100MHz)22.67, 24.38, 25.21, 28.13, 29.72, 60.55, 61.31, 63.12, 64.57, 102.21,102.36,148.13,148.38,153.27,167.05,167.91,168.35.HRMS Calcd for C11H15N3O4Na 276.0955 Found 276.0970.

# 4. NMR and HRMS spectra of compound 2-5

**Fig S1** 1HNMR of boc prolinol **(2)**

**Fig S2** 13C NMR of boc prolinol **(2)**


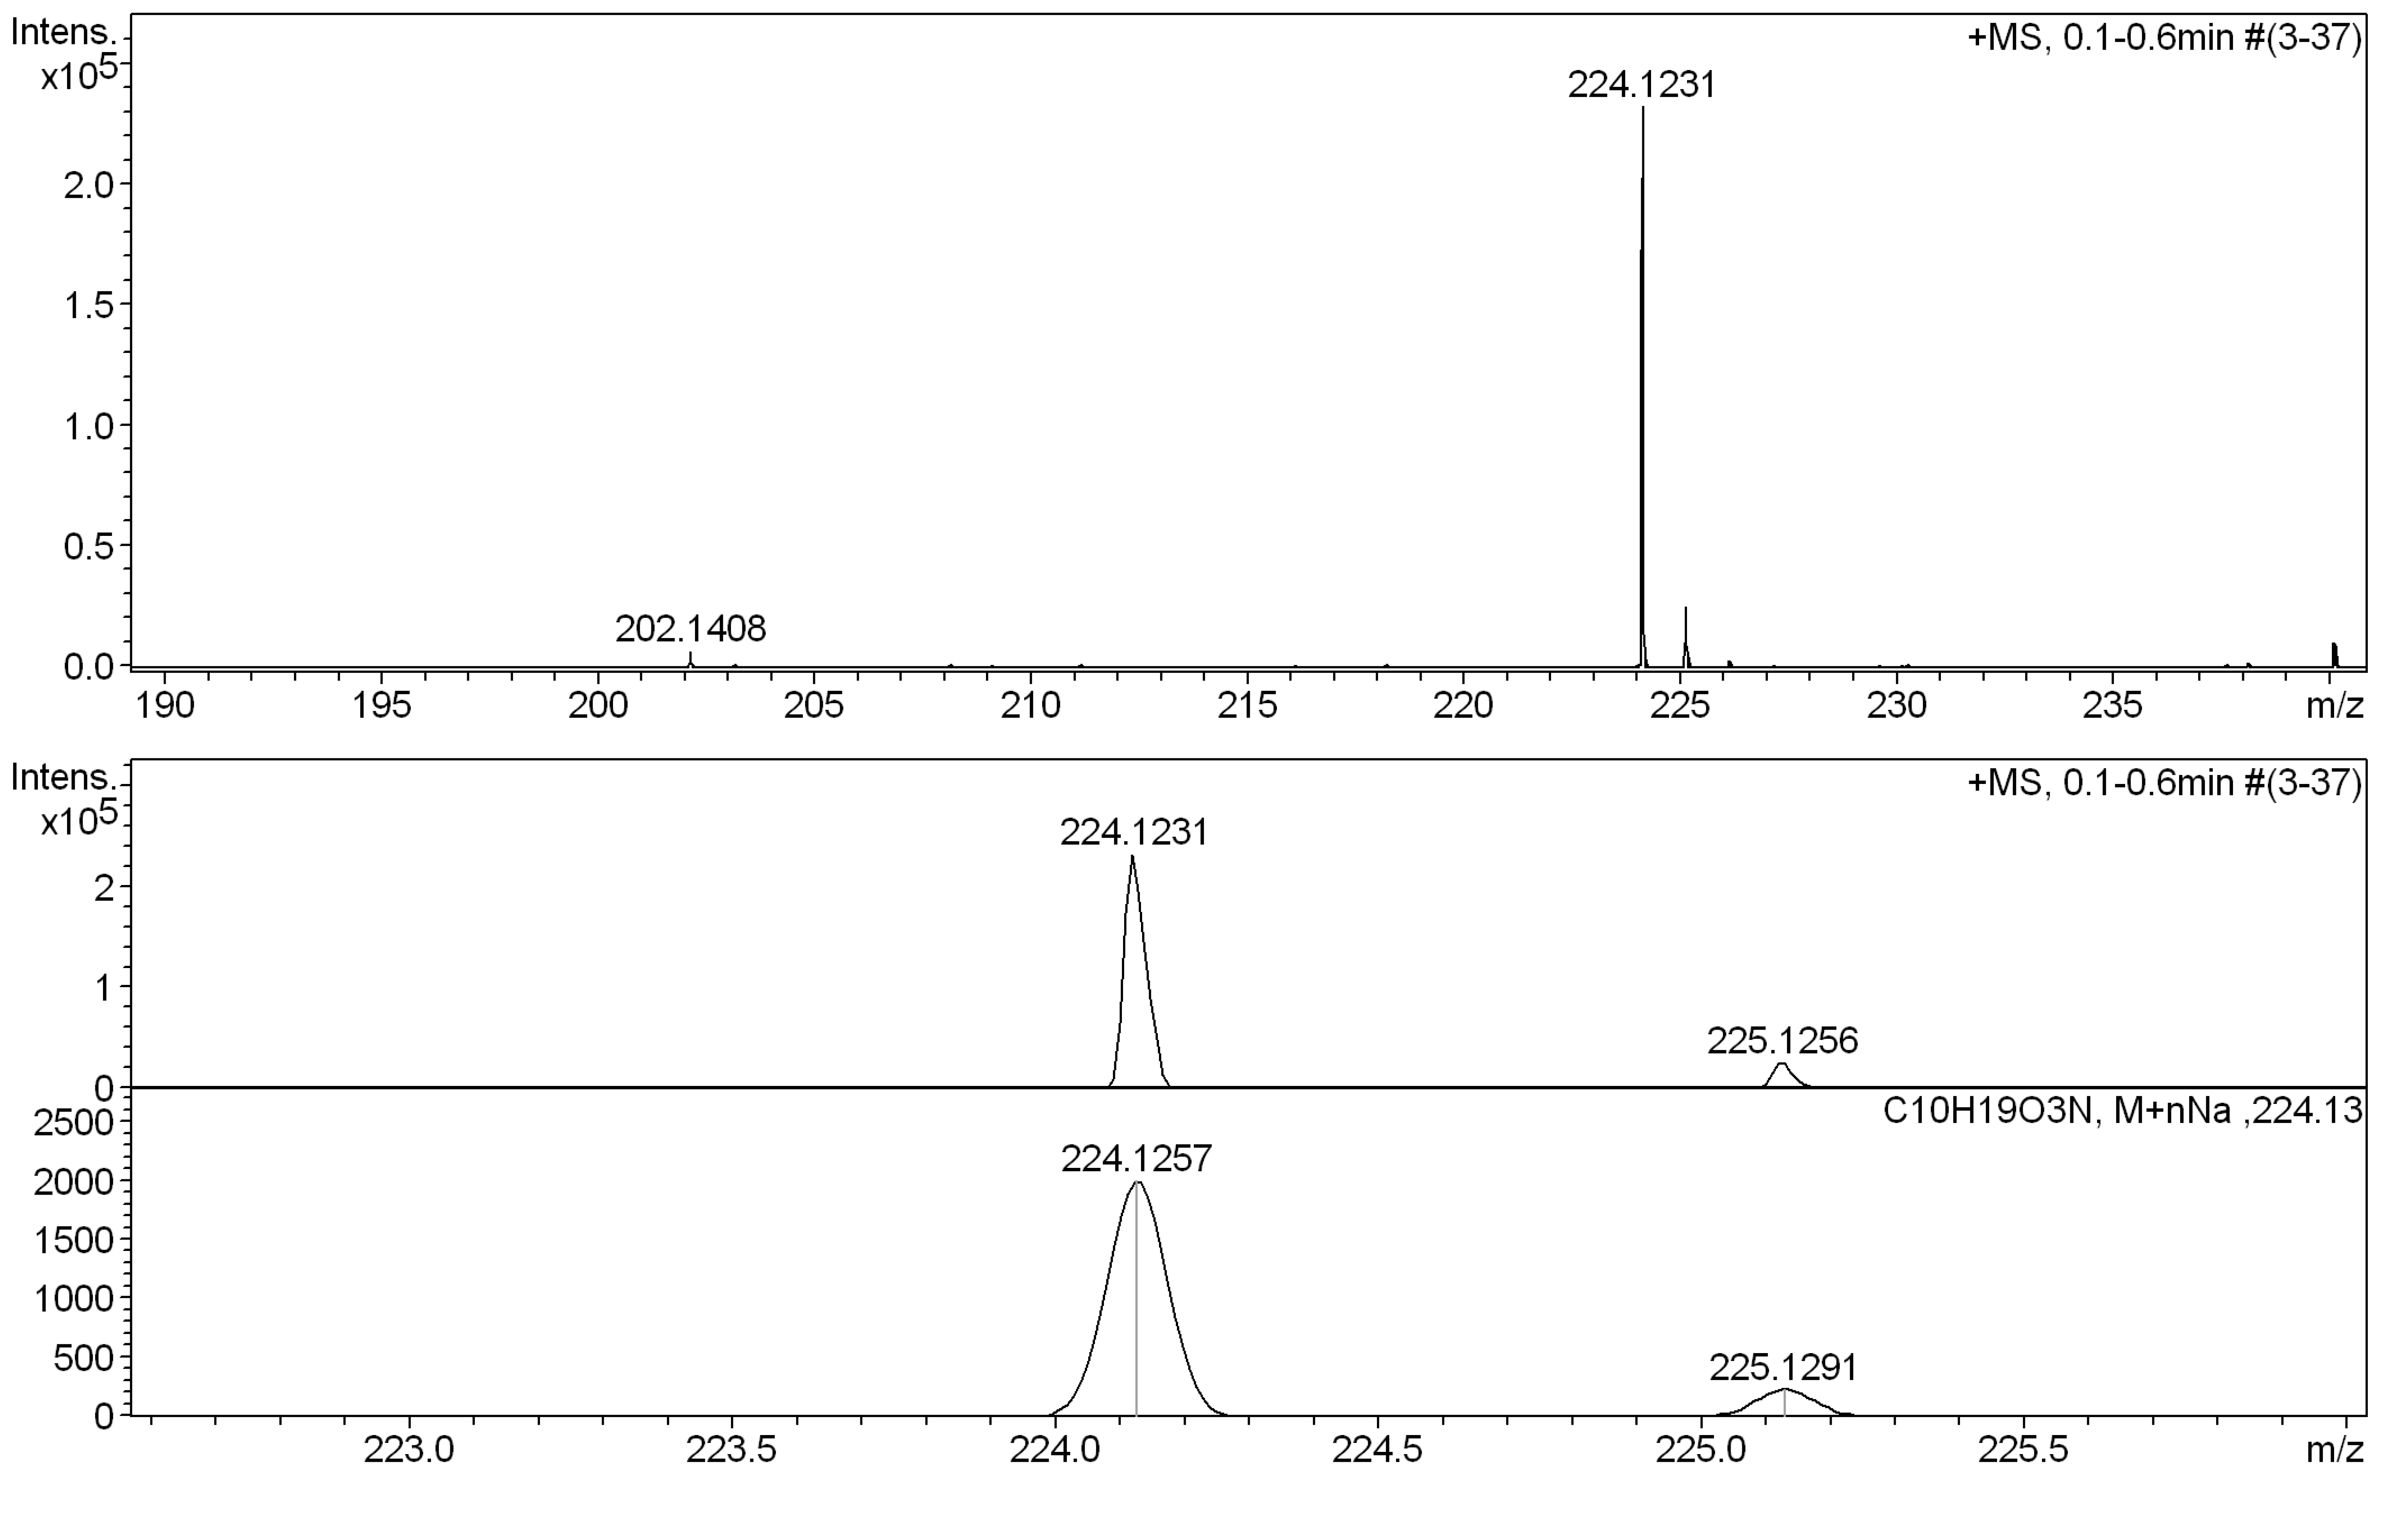


**Fig S3** HRMS of boc prolinol **(2)**

**Fig S4** 1HNMR of benzoyl bocprolinol **(3)**

**Fig S5** 13CNMR of benzoyl bocprolinol **(3)**


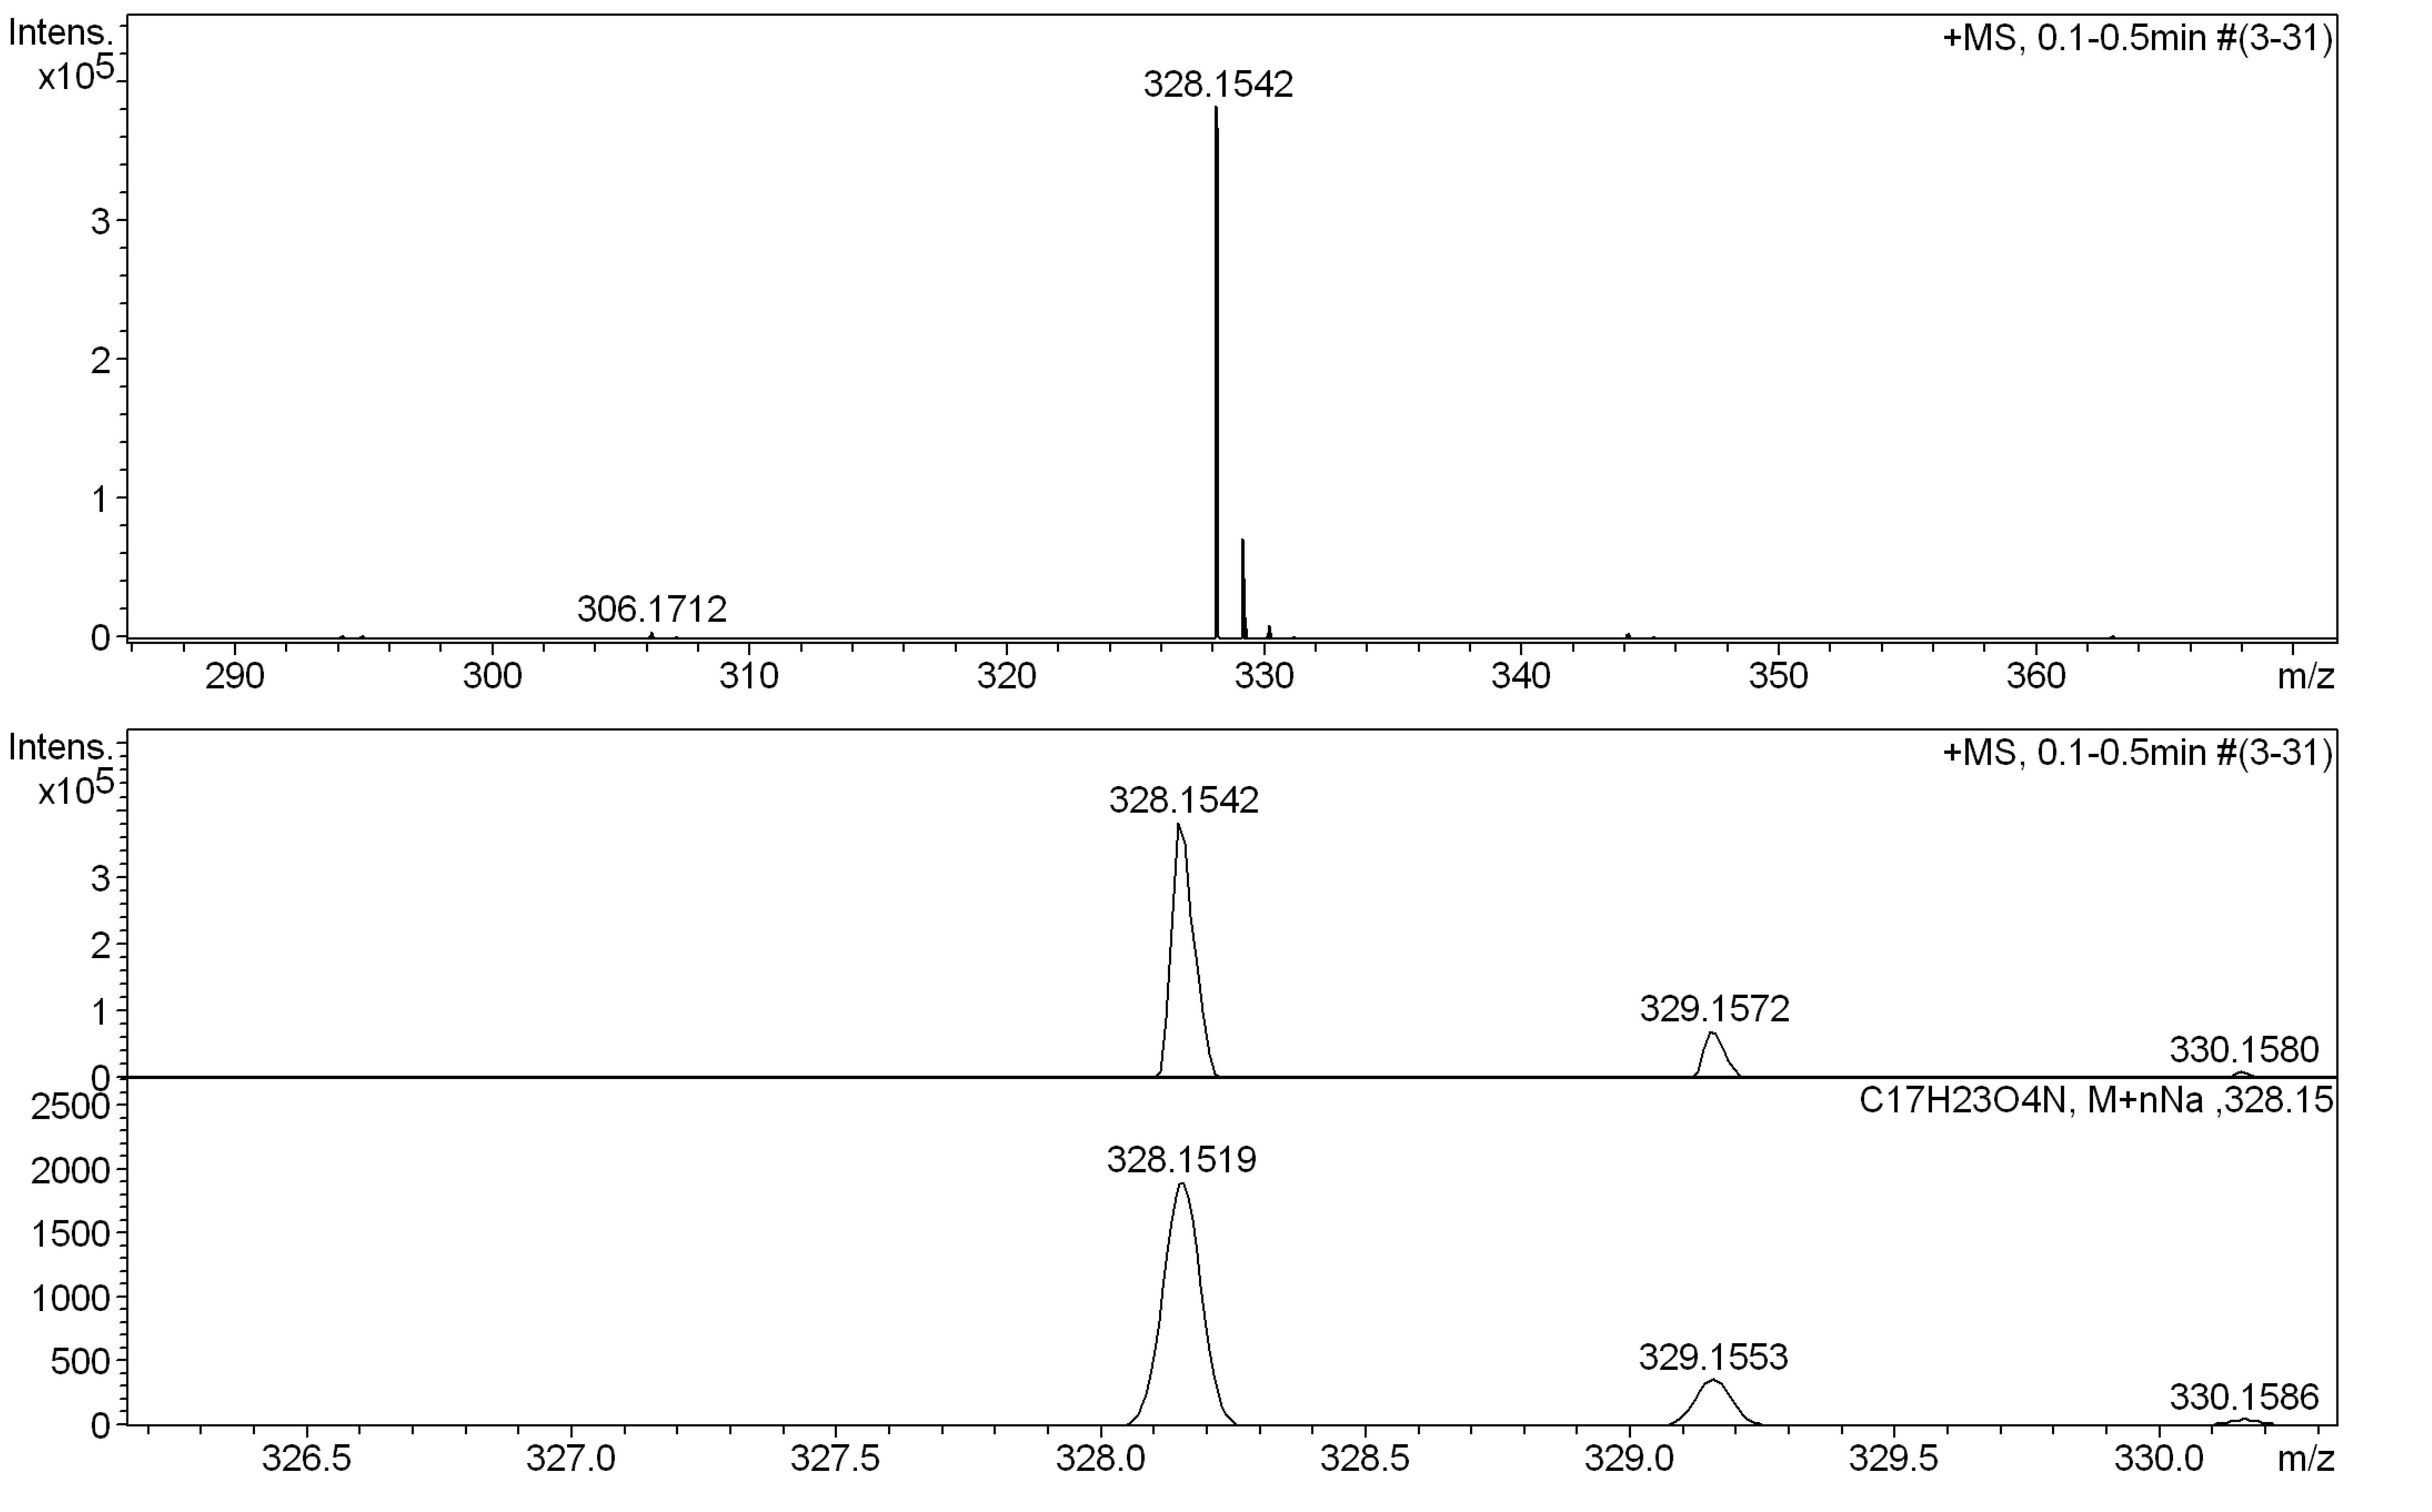


**Fig S6** HRMS of benzoyl bocprolinol **(3)**

**Fig S7** 1H NMR of S-(1-(2-Chloroacetyl)pyrrolidine-2-yl)methyl benzoate **(4)**

**Fig S8** 13C NMR of S-(1-(2-Chloroacetyl)pyrrolidine-2-yl)methyl benzoate **(4)**


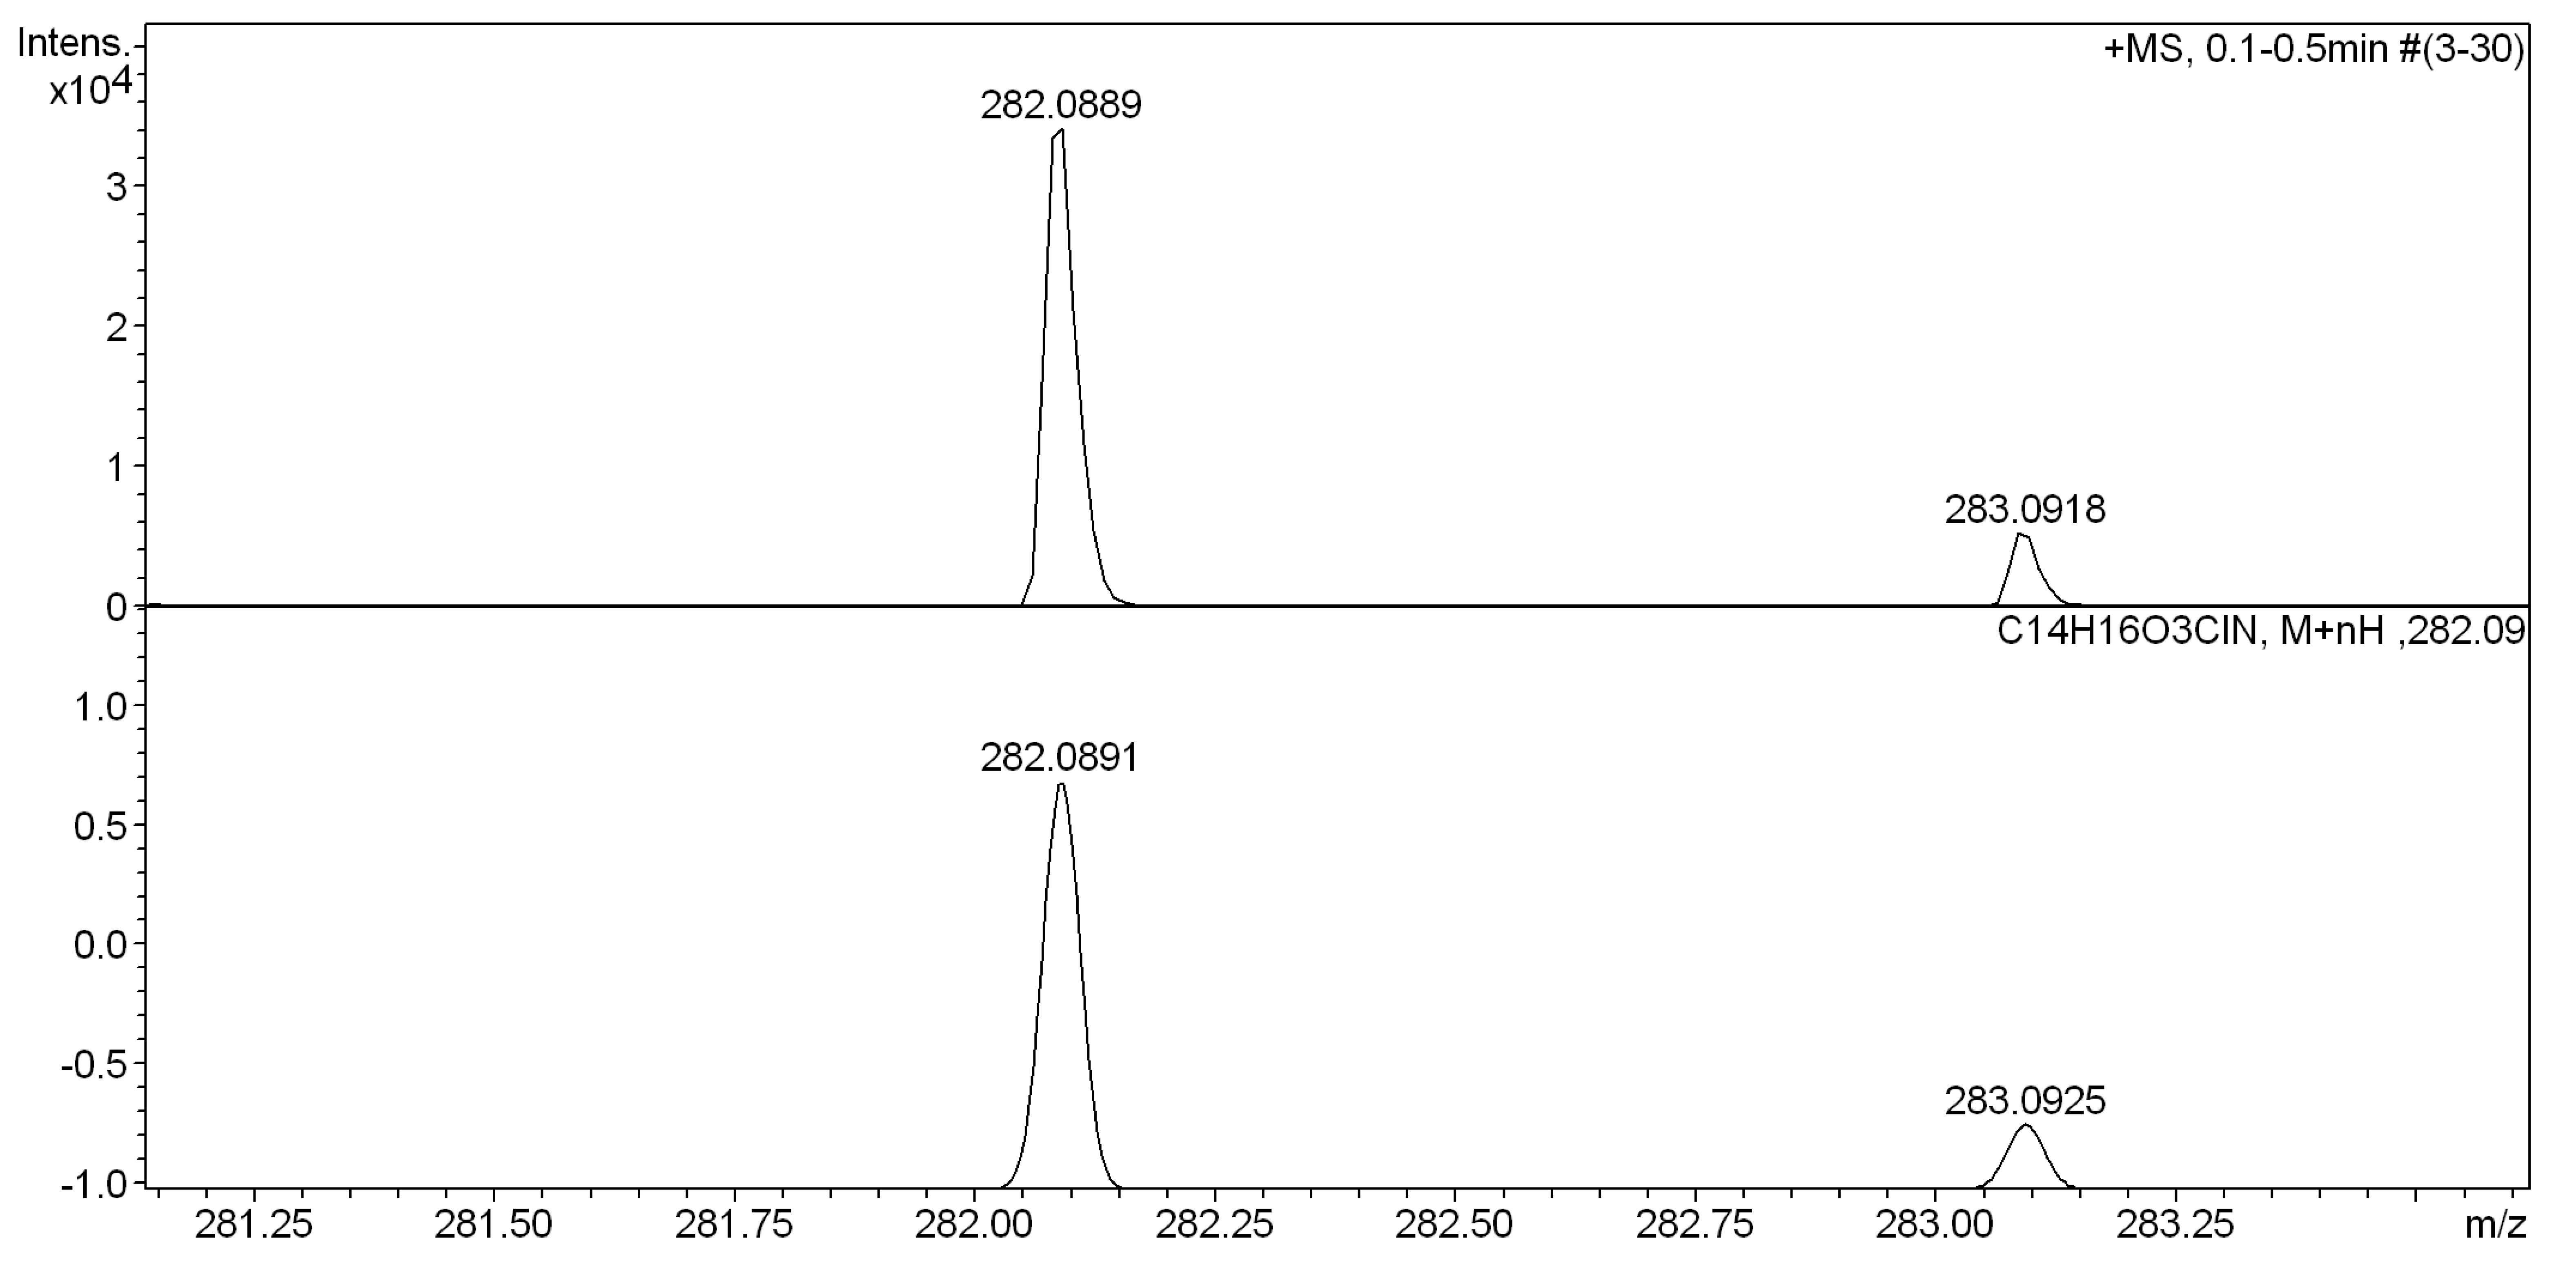


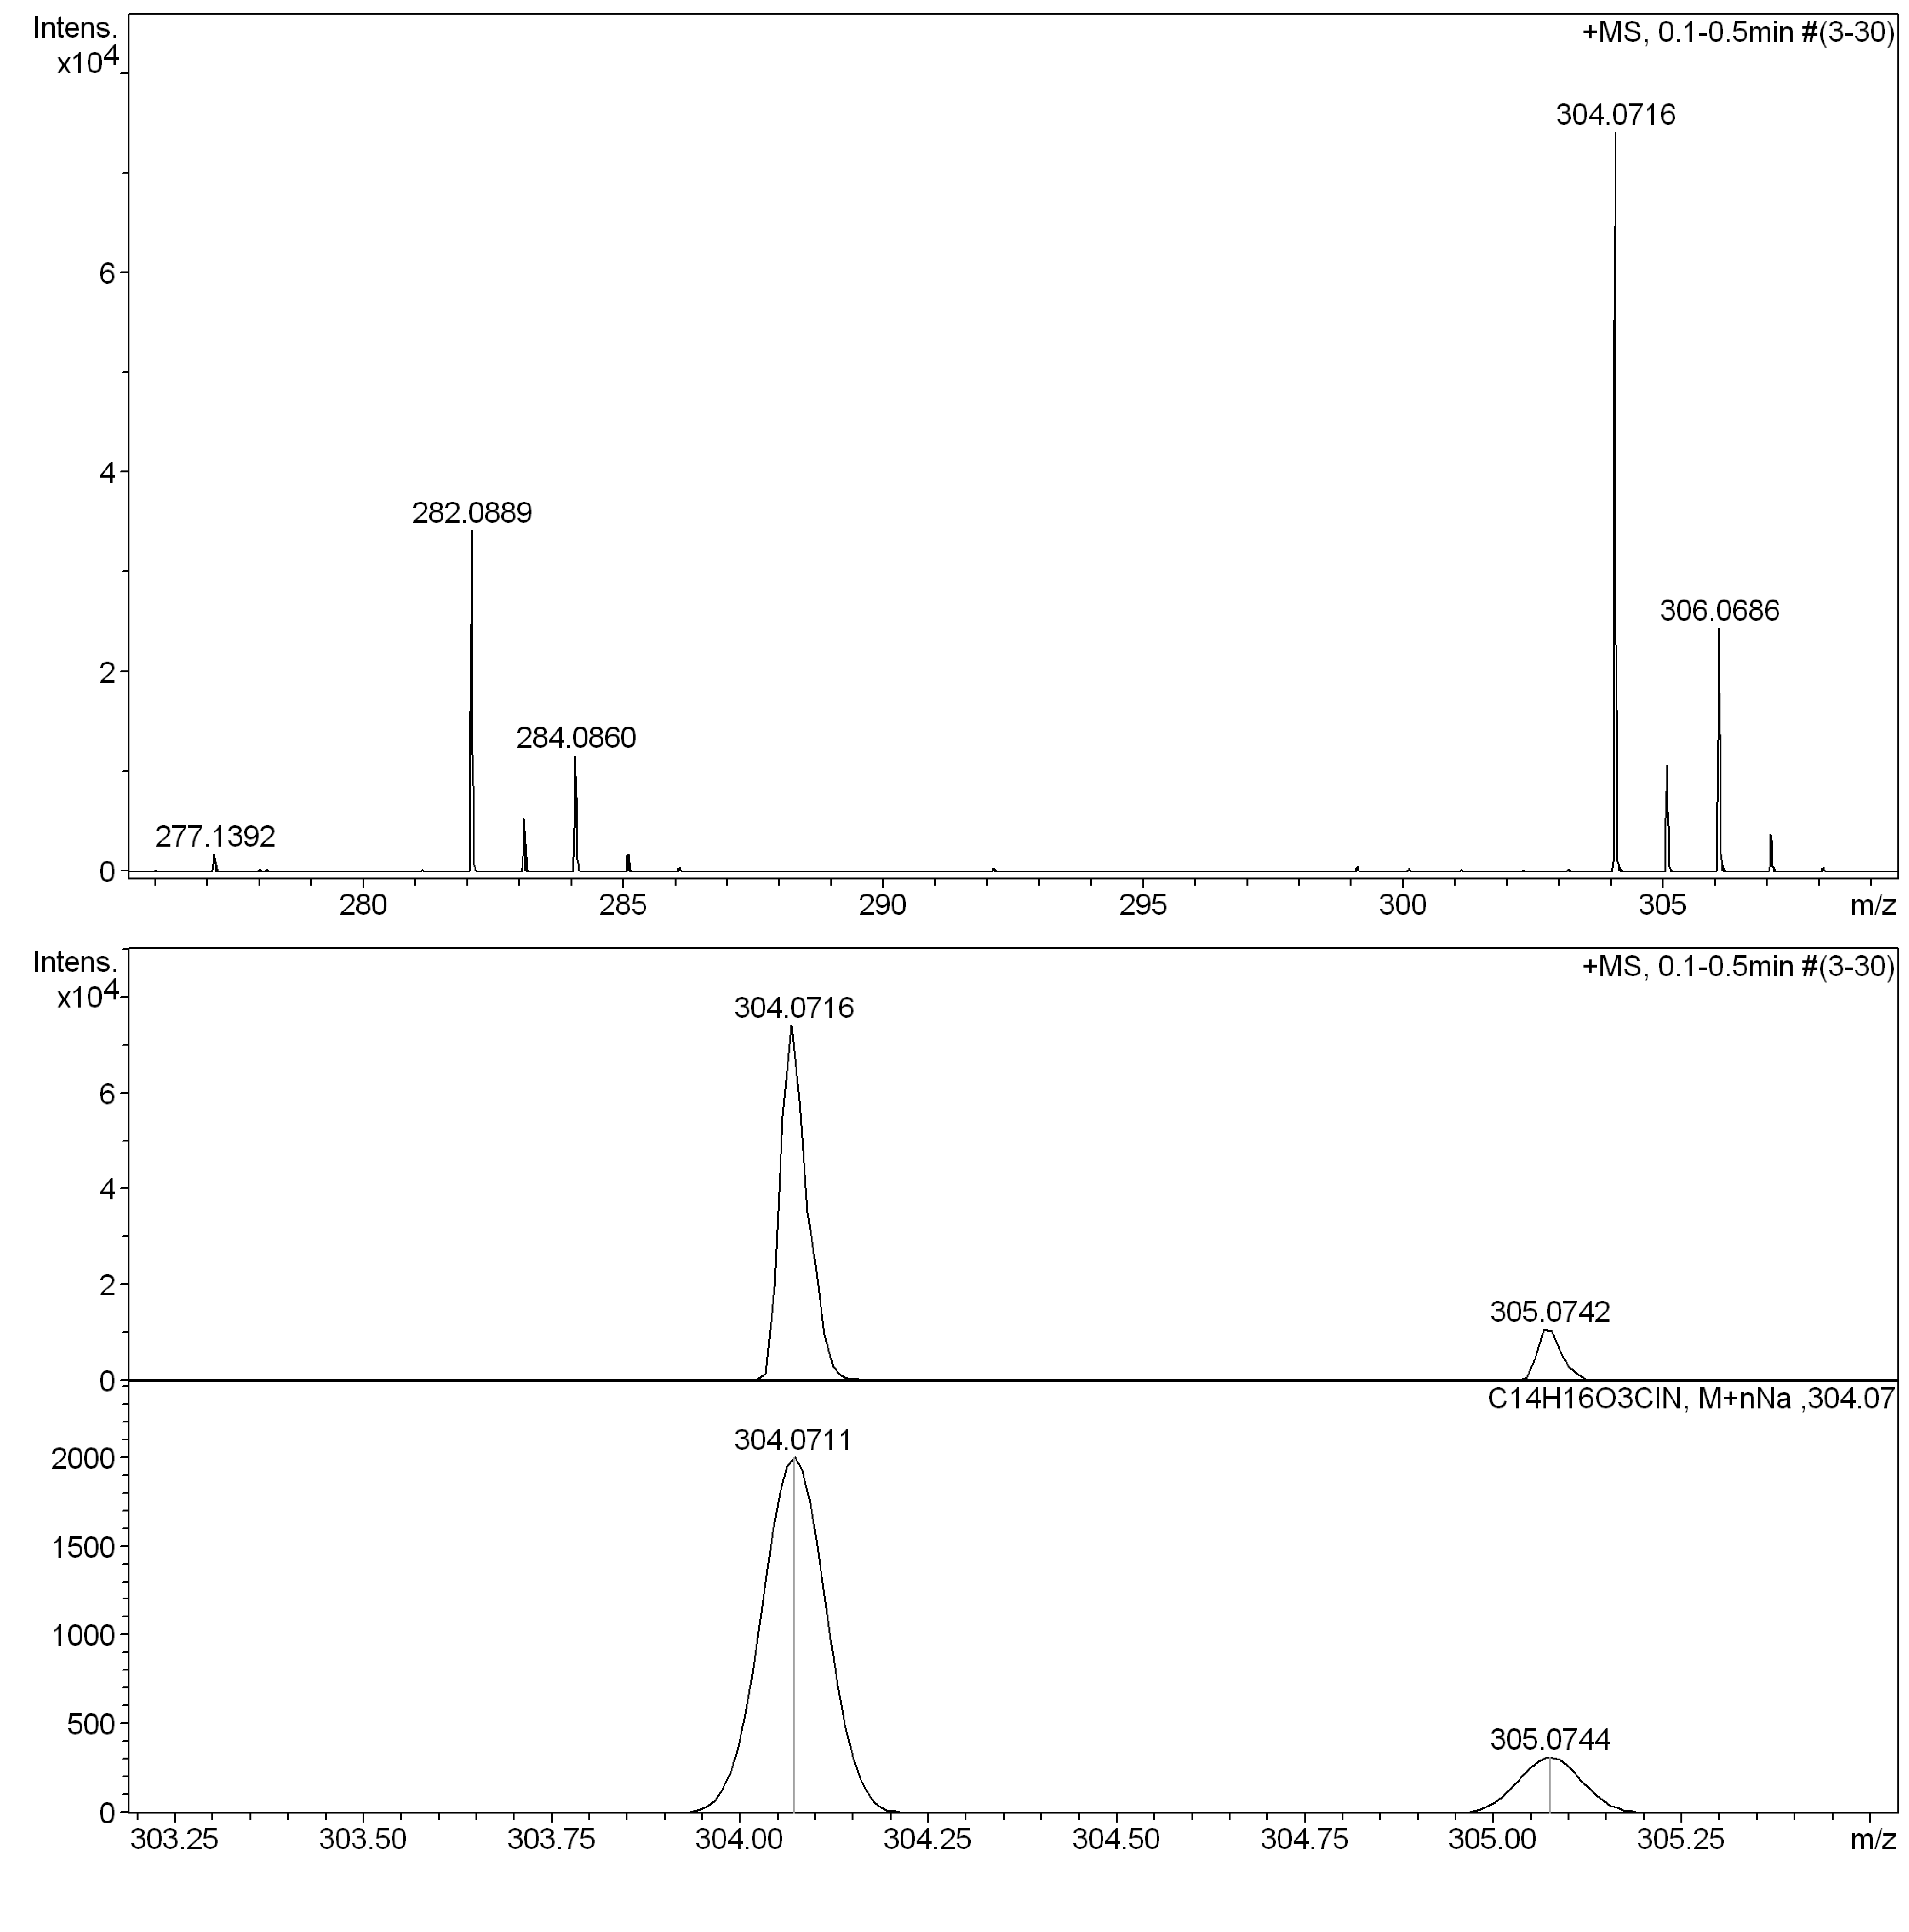


**Fig S9** HRMS of S-(1-(2-Chloroacetyl)pyrrolidine-2-yl)methyl benzoate **(4)**

**Fig S10** 1H NMR of Prolamide Thymidine alcohol **(5b)**

**Fig S11** 13C NMR Prolamide Thymidine alcohol **(5b)**

**Fig S12** HRMS Prolamide Thymidine alcohol **(5b)**

**Fig S13** 1H NMR of Prolamide Uridine alcohol **(5a)**


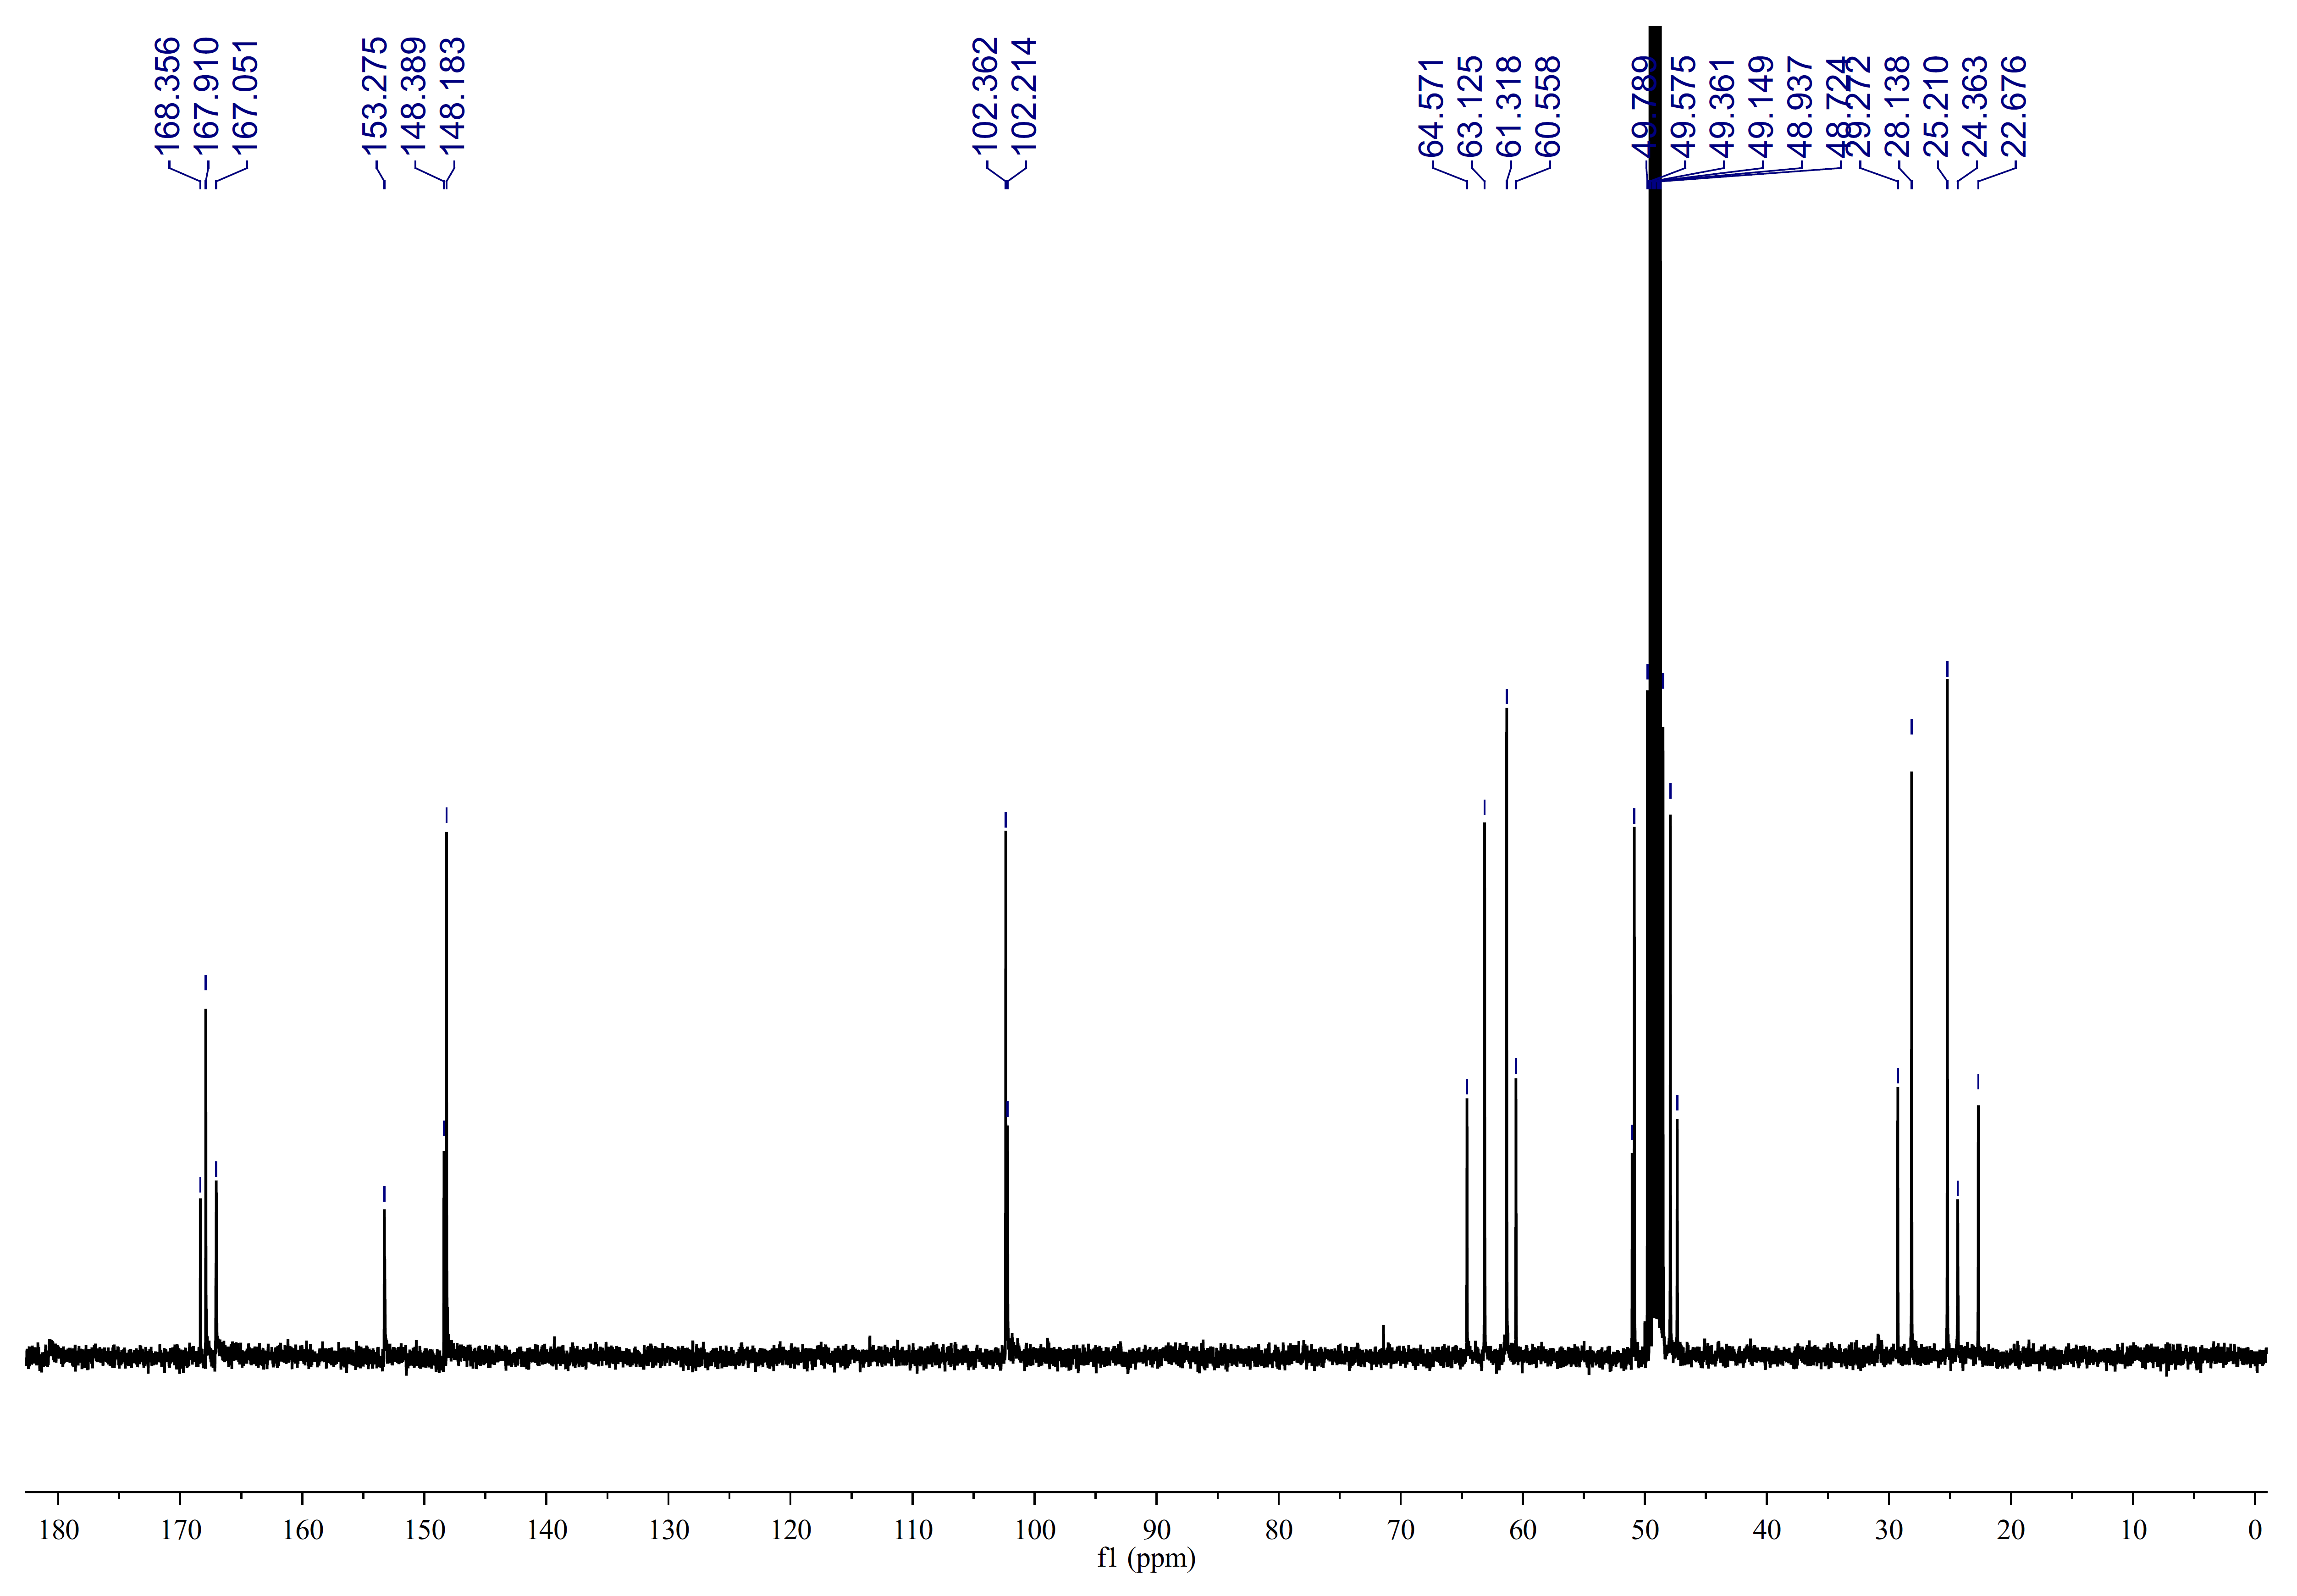


**Fig S14** 13C NMR of Prolamide uridine alcohol **(5a)**


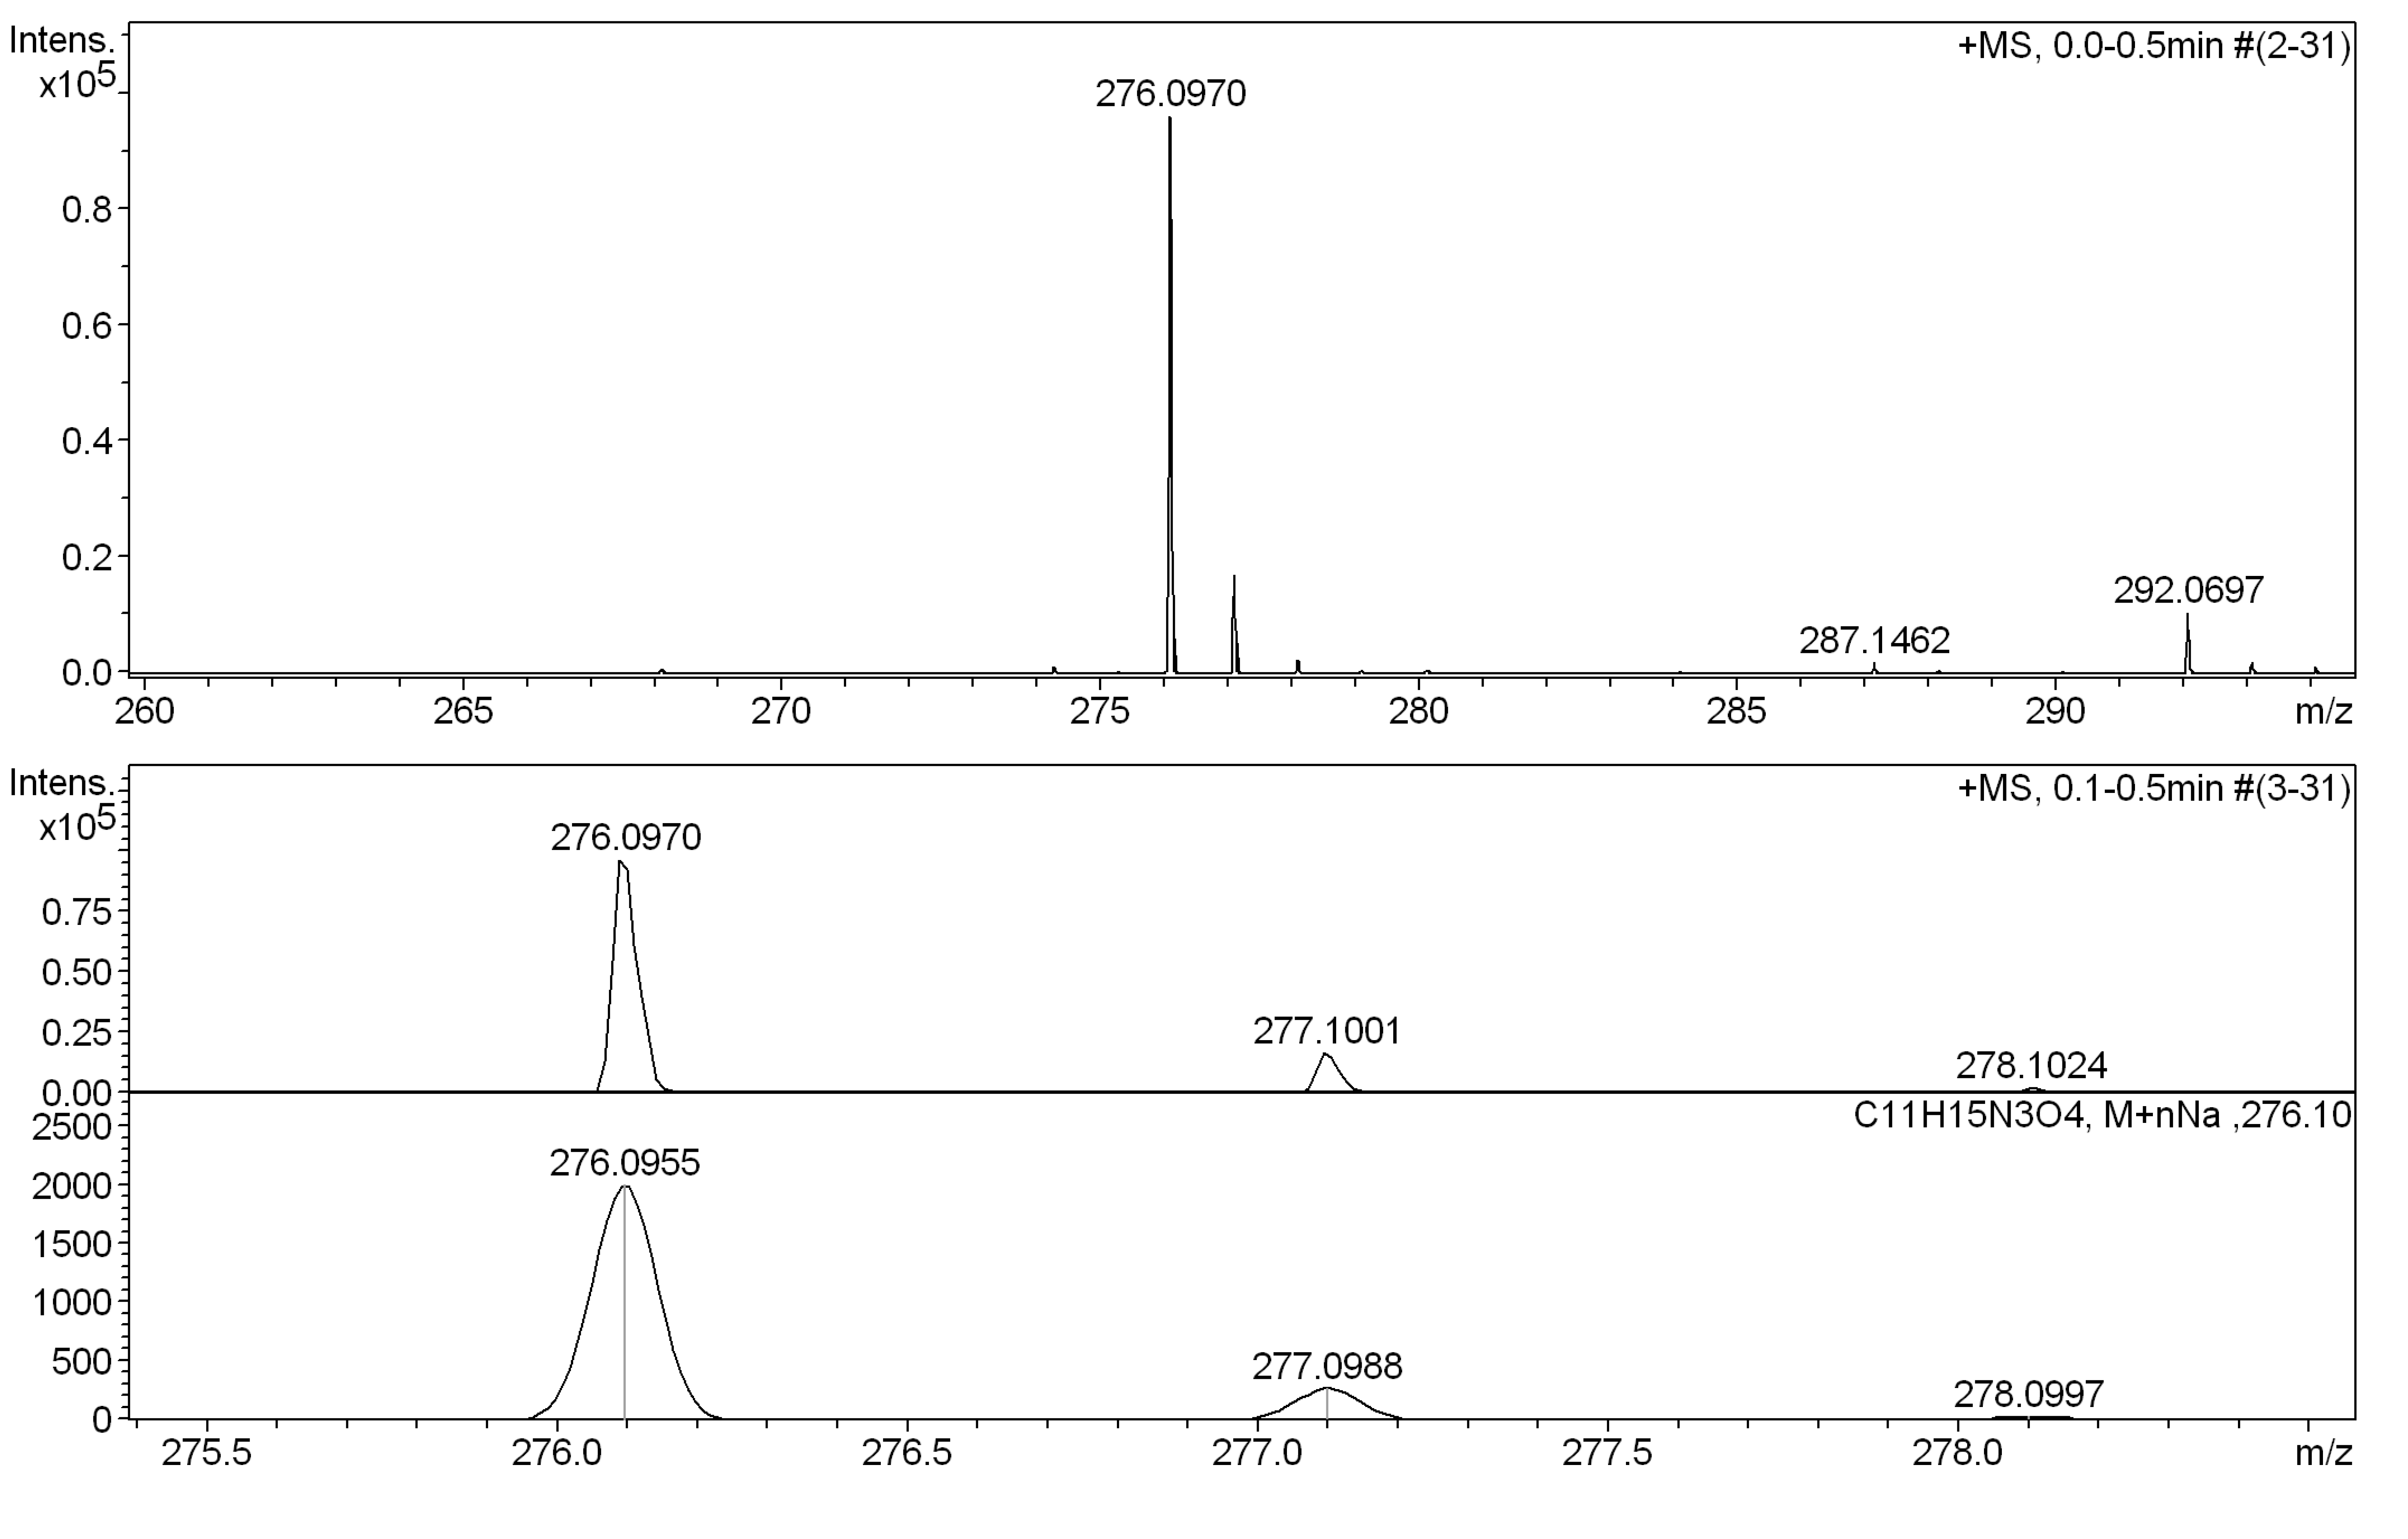
**Fig S15** HRMS Prolamide Uridine alcohol **(5a)**

# 5. Self-assembly study of 5a and 5b by ESI-MS

**Monomer**

**Dimer**

**Trimer**

**Tetramer**

**Fig S16**. ESI-MS of prolinol acetyl uracil (**5a**)

**Trimer**

**Dimer**

**Monomer**

**Tetramer**

**Fig S17.** ESI-MS of prolinol acetyl Thymine(**5b**)

# 6. SEM –images of compound 5a


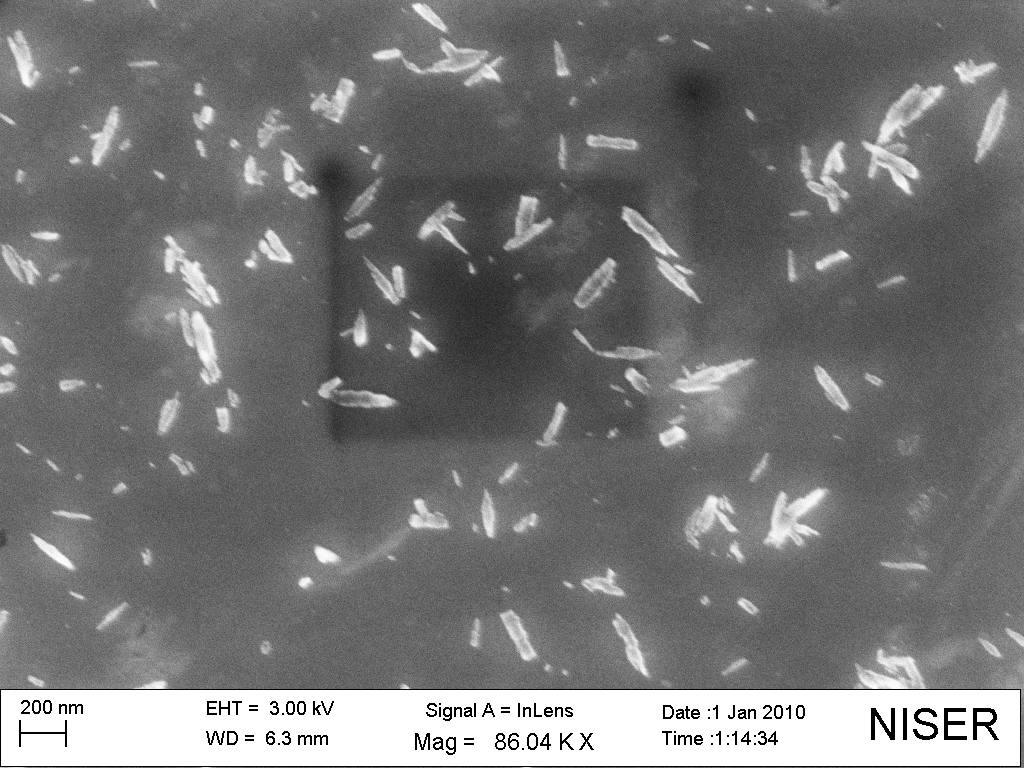


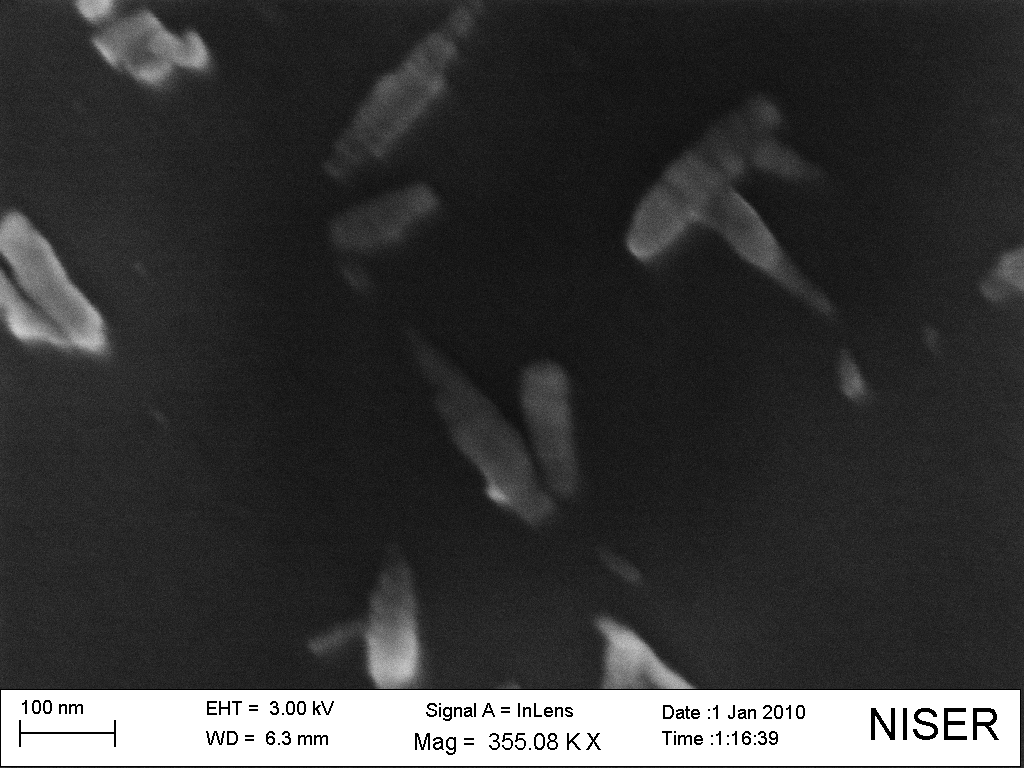


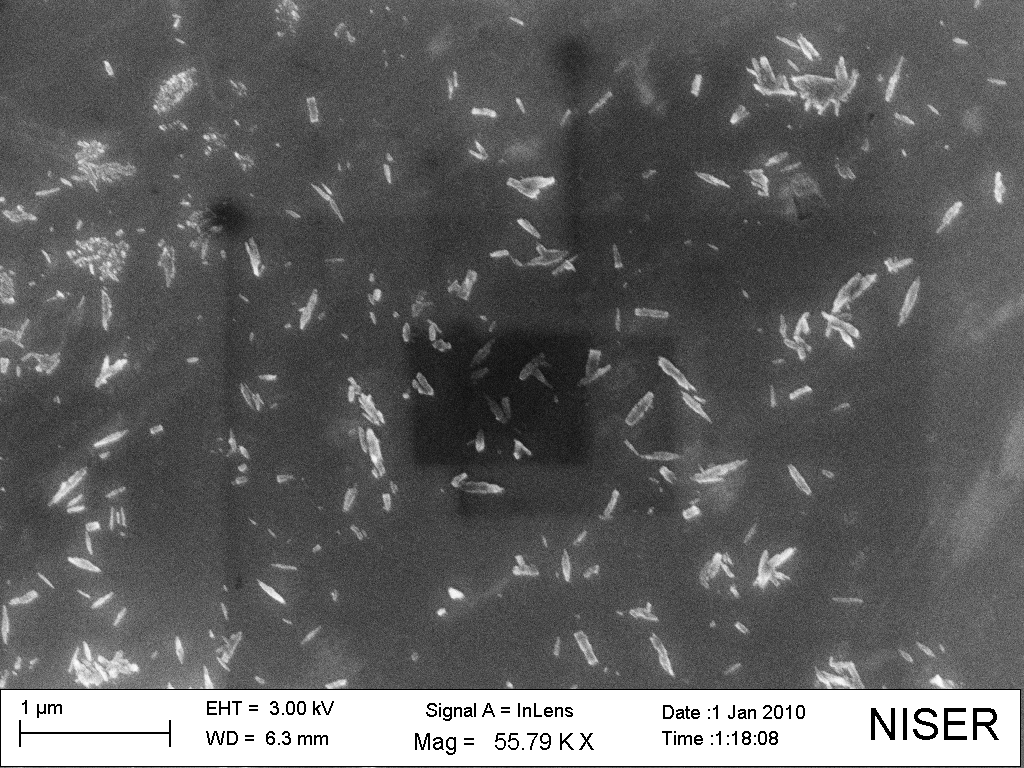


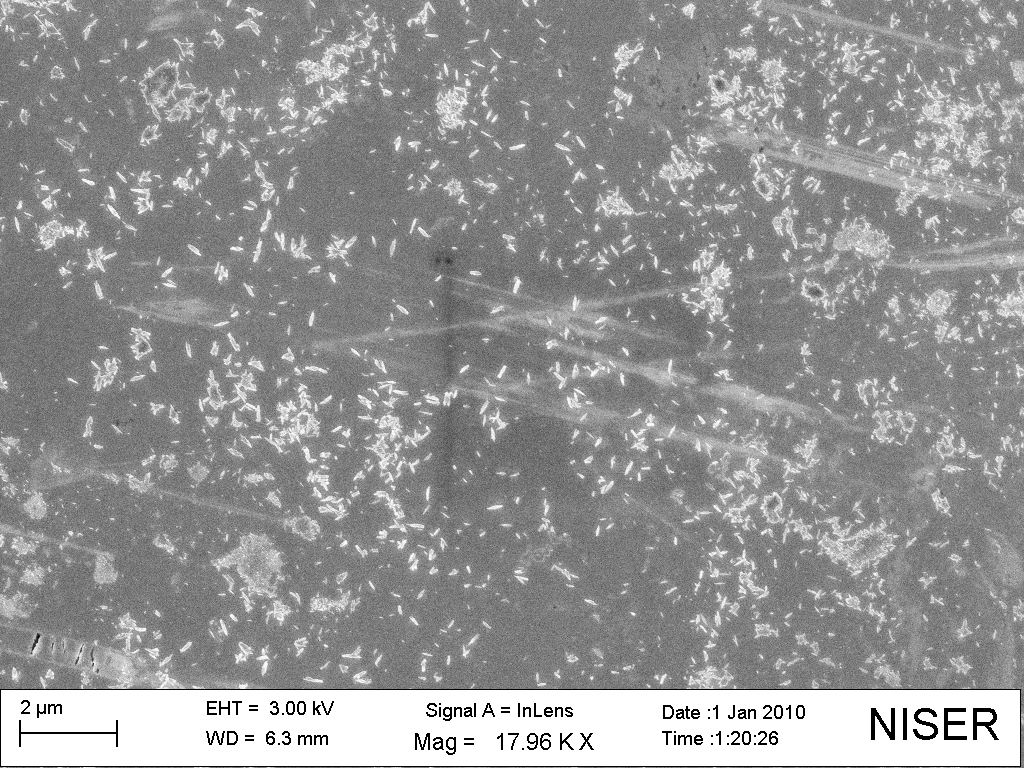


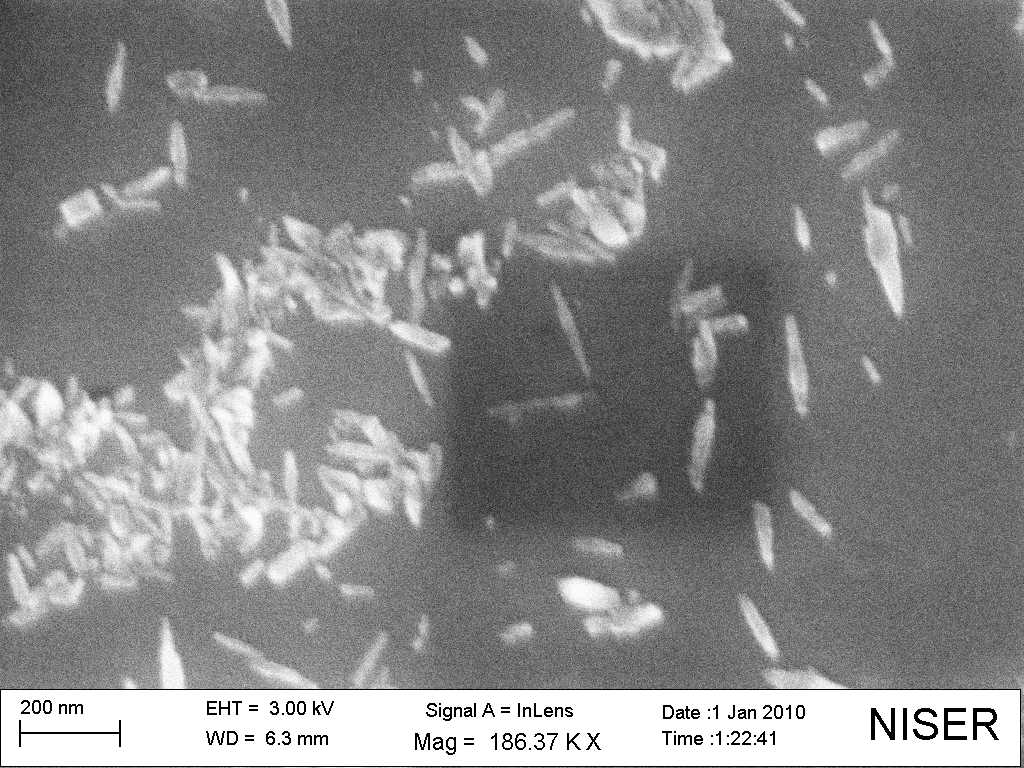


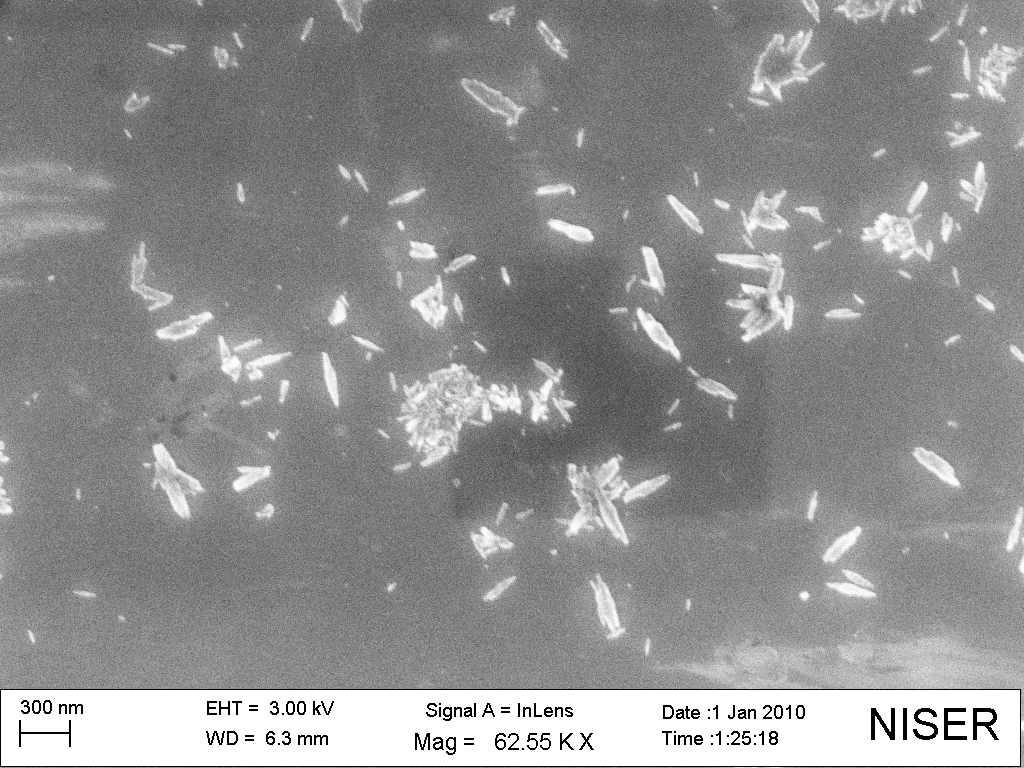


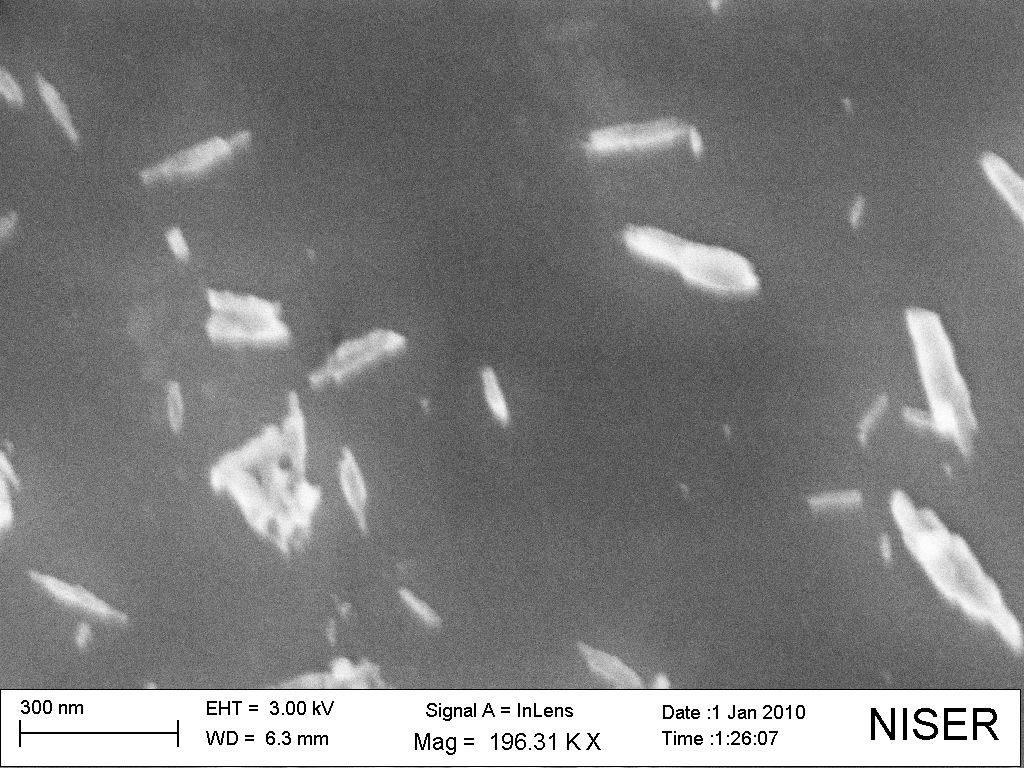


# 6. SEM –images of compound 5b


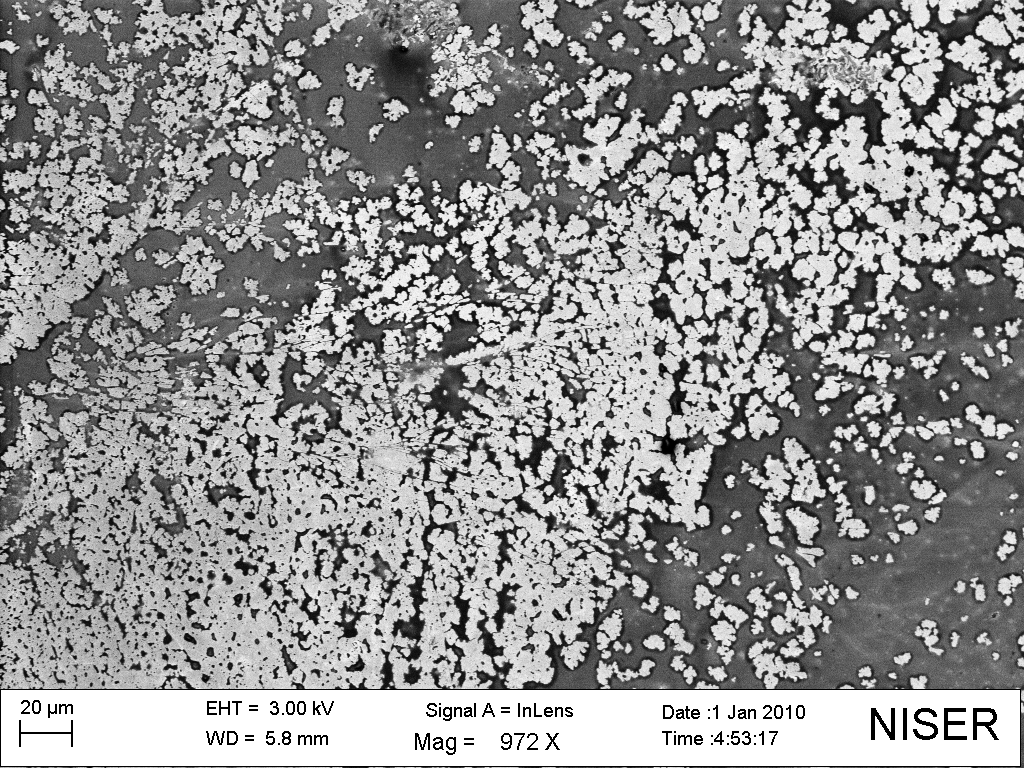


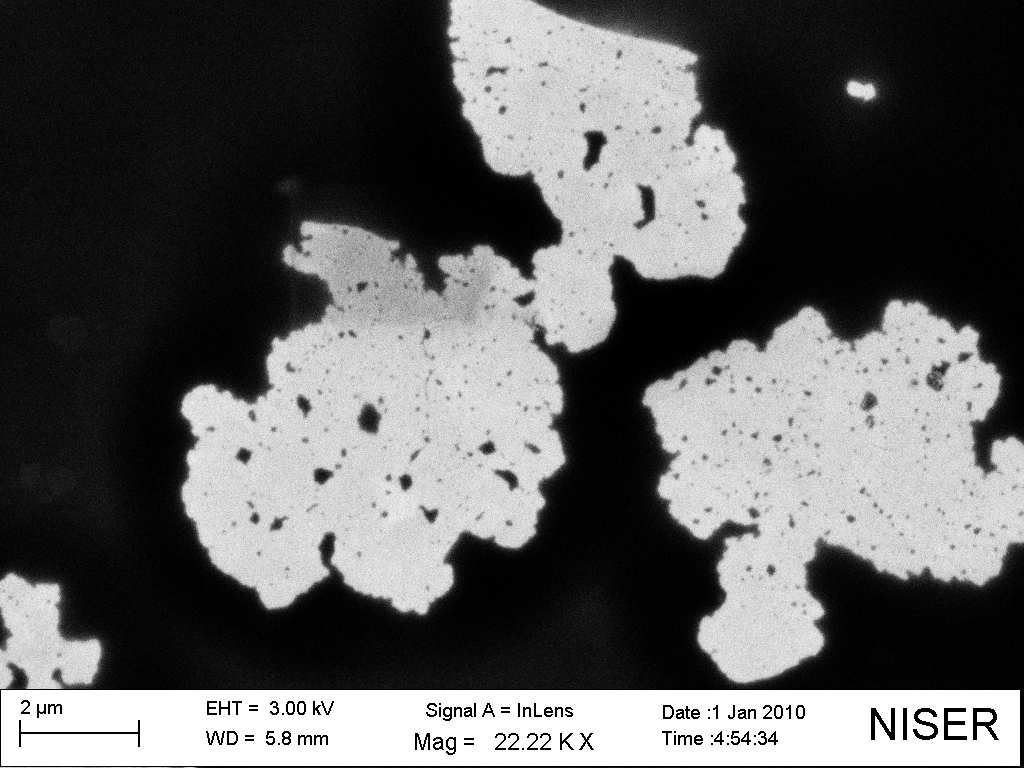


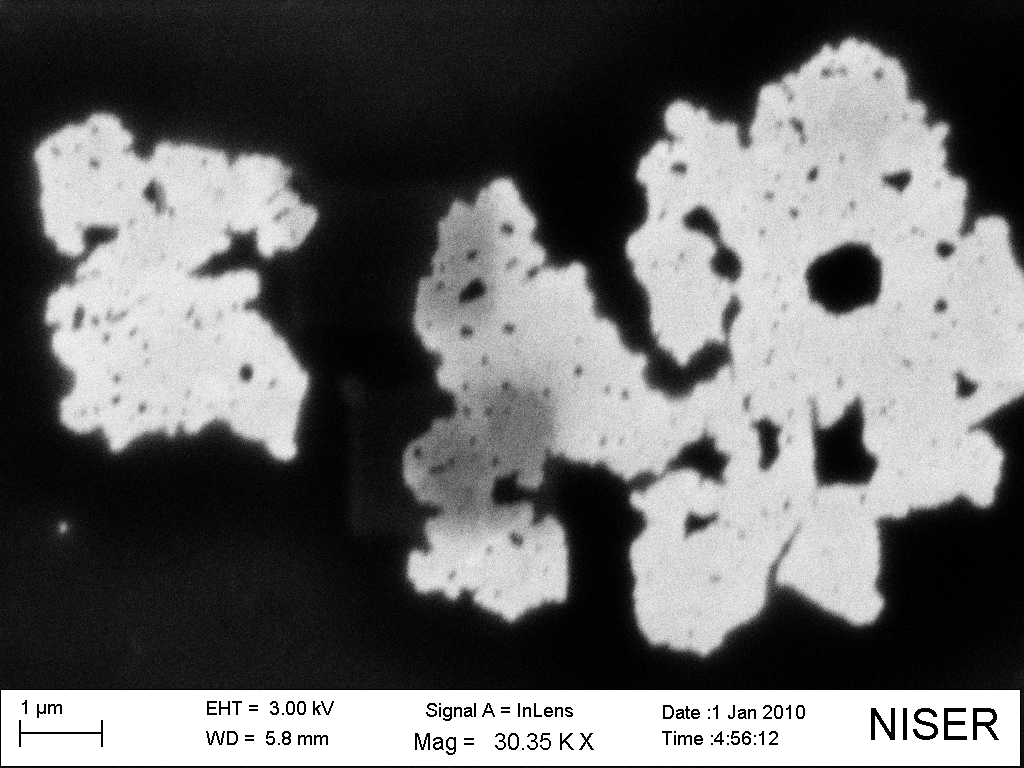


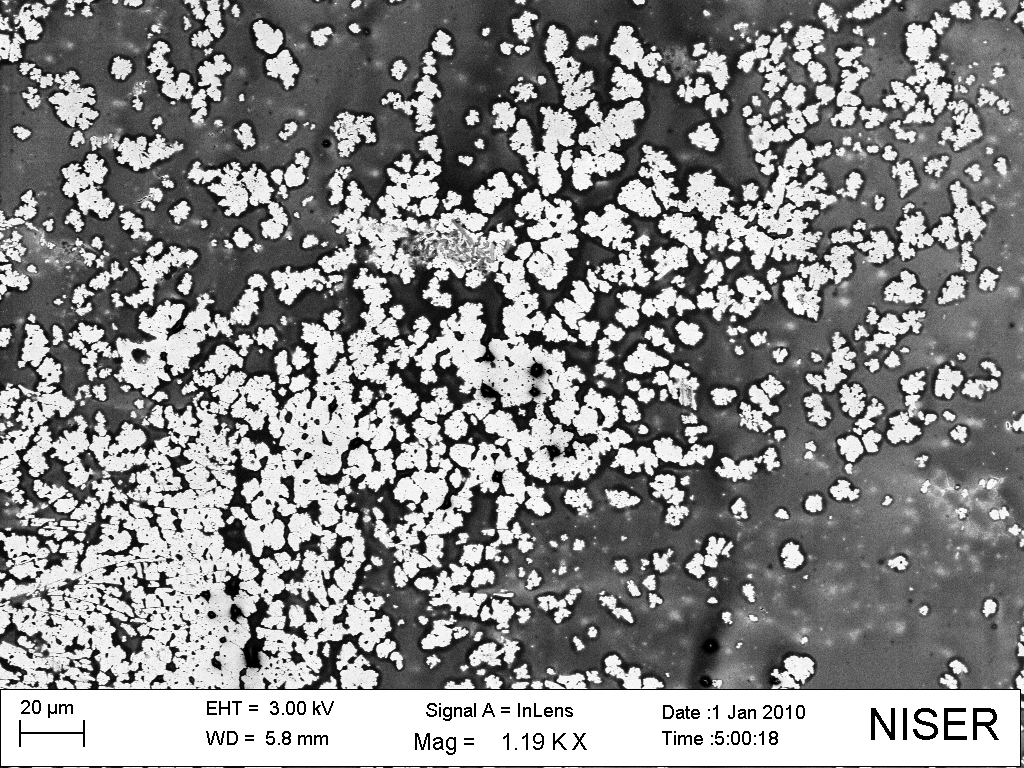


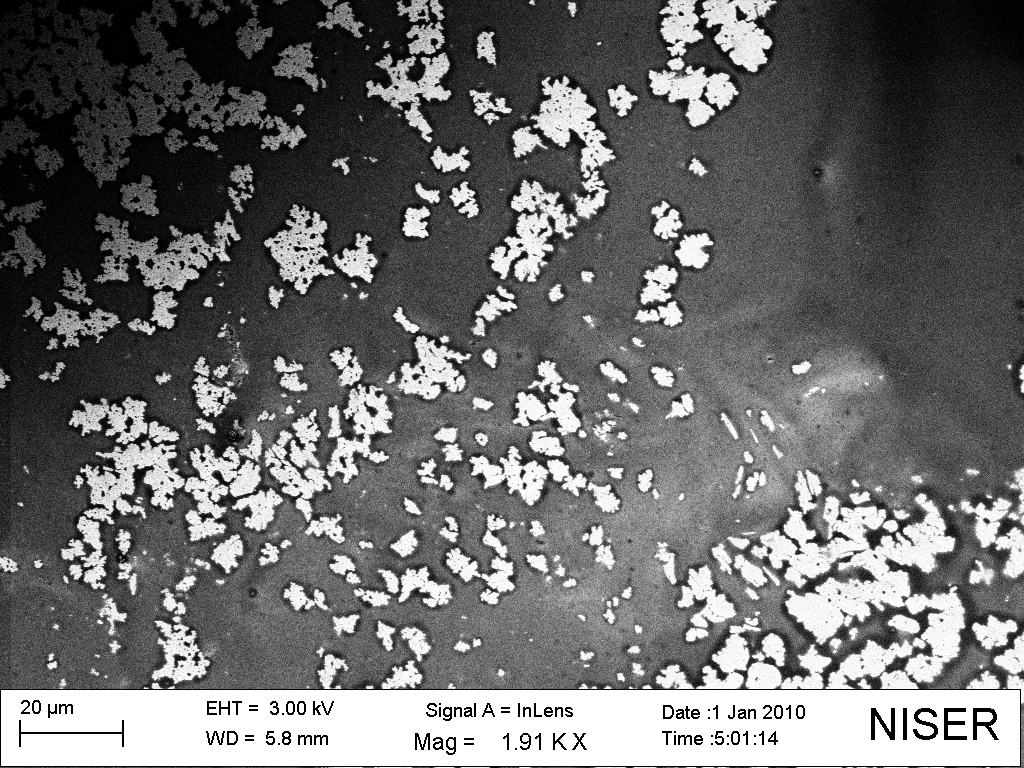


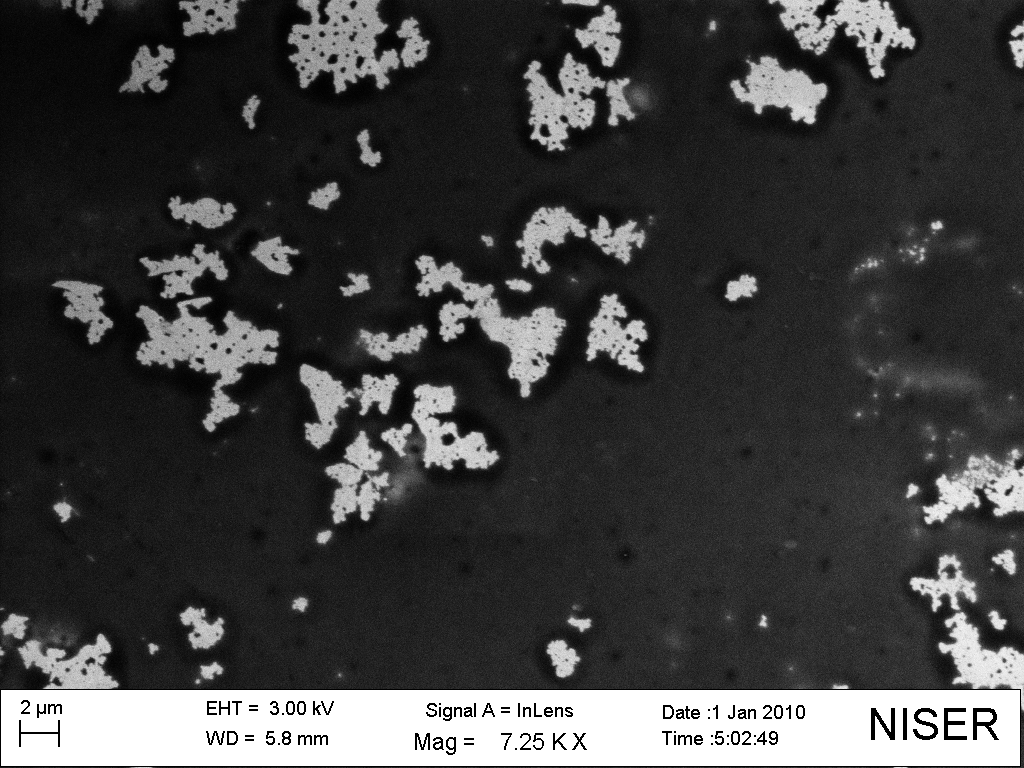


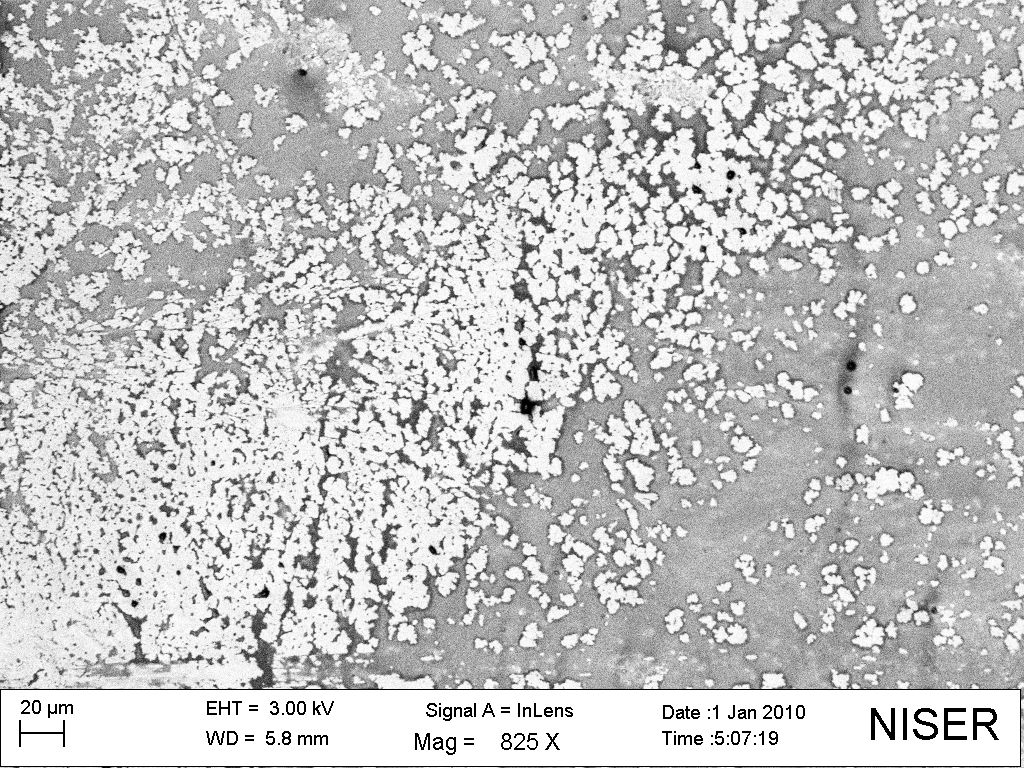


# 7. IR-Spectra of compound 5a/5b
